# Supplementary material for: Midlife socioeconomic position and old-age dementia mortality: a large prospective register-based study from Finland
Source: PubMed Central journal article supplement (PMC6955538; doi:10.1136/bmjopen-2019-033234), 2020-01-06
Supplement: bmjopen-2019-033234.draft_revisions.pdf [file bmjopen-2019-033234.draft_revisions.pdf]

# BMJ Open

BMJ Open is committed to open peer review. As part of this commitment we make the peer review history of every article we publish publicly available.

When an article is published we post the peer reviewers' comments and the authors' responses online. We also post the versions of the paper that were used during peer review. These are the versions that the peer review comments apply to.

The versions of the paper that follow are the versions that were submitted during the peer review process. They are not the versions of record or the final published versions. They should not be cited or distributed as the published version of this manuscript.

BMJ Open is an open access journal and the full, final, typeset and author-corrected version of record of the manuscript is available on our site with no access controls, subscription charges or pay-per-view fees (<http://bmjopen.bmj.com>).

If you have any questions on BMJ Open's open peer review process please email [info.bmjopen@bmj.com](mailto:info.bmjopen@bmj.com)

# BMJ Open

## Midlife socioeconomic position and old-age dementia mortality: a large prospective register-based study from Finland

|                                                                                                                                                         |                                                                                                                                                                                                                                                                      |
|---------------------------------------------------------------------------------------------------------------------------------------------------------|----------------------------------------------------------------------------------------------------------------------------------------------------------------------------------------------------------------------------------------------------------------------|
| Journal:                                                                                                                                                | <i>BMJ Open</i>                                                                                                                                                                                                                                                      |
| Manuscript ID                                                                                                                                           | bmjopen-2019-033234                                                                                                                                                                                                                                                  |
| Article Type:                                                                                                                                           | Research                                                                                                                                                                                                                                                             |
| Date Submitted by the Author:                                                                                                                           | 26-Jul-2019                                                                                                                                                                                                                                                          |
| Complete List of Authors:                                                                                                                               | Korhonen, Kaarina; University of Helsinki, Population Research Unit<br>Einiö, Elina; University of Helsinki<br>Leinonen, Taina; Finnish Institute of Occupational Health,<br>Tarkiainen, Lasse; University of Helsinki<br>Martikainen, Pekka; University of Helsinki |
| Keywords:                                                                                                                                               | Dementia < NEUROLOGY, Socioeconomic factors, Alzheimer's disease, Register study                                                                                                                                                                                     |
| Note: The following files were submitted by the author for peer review, but cannot be converted to PDF. You must view these files (e.g. movies) online. |                                                                                                                                                                                                                                                                      |
| Image1.tif                                                                                                                                              |                                                                                                                                                                                                                                                                      |

SCHOLARONE™  
Manuscripts

1  
2  
3  
4 **Midlife socioeconomic position and old-age dementia mortality: a large prospective**  
5  
6 **register-based study from Finland**  
7  
8  
9  
10  
11

12 Kaarina Korhonen<sup>1</sup>, Elina Einiö<sup>1,2,3</sup>, Taina Leinonen<sup>4</sup>, Lasse Tarkiainen<sup>1</sup>, Pekka Martikainen<sup>1,3,5</sup>

15 <sup>1</sup> Population Research Unit, Faculty of Social Sciences, University of Helsinki, Helsinki, Finland

17 <sup>2</sup> Department of Social Policy, London School of Economics and Political Science, London, United Kingdom

18 <sup>3</sup> Max Planck Institute for Demographic Research, Rostock, Germany

20 <sup>4</sup> Finnish Institute of Occupational Health, Helsinki, Finland

21 <sup>5</sup> Department of Public Health Sciences, Stockholm University, Stockholm, Sweden

23  
24 Correspondence to:

25  
26 Kaarina Korhonen

27  
28 Faculty of Social Sciences

29  
30 P.O. Box 18, 00014 University of Helsinki, Finland

31  
32 +358 50 3199 388

33  
34 kaarina.korhonen@helsinki.fi

35  
36  
37 Word count: 3 476  
38  
39  
40  
41  
42  
43  
44  
45  
46  
47  
48  
49  
50  
51  
52  
53  
54  
55  
56  
57  
58  
59  
60

## Abstract

**Objectives** To assess the association between multiple indicators of socioeconomic position and dementia-related death, and to estimate the contribution of dementia to socioeconomic differences in overall mortality at older ages.

**Design** Prospective population-based register study.

**Setting** Finland.

**Participants** 11% random sample of men and women aged 70–87 resident in Finland at the end of 2000 (N=54 964).

**Main outcome measure** Incidence rates, Kaplan-Meier survival probabilities and Cox regression hazard ratios of dementia mortality in 2001–2016 by midlife education, occupational social class and household income measured at ages 53–57 years.

**Results** During the 528 387 person-years at risk, 11 395 individuals died from dementia (215.7 per 10 000 person-years). Lower midlife education, occupational social class and household income were associated with higher dementia mortality, and the differences persisted to the oldest old ages. Compared to mortality from all other causes, however, the socioeconomic differences emerged later and were altogether smaller. Dementia accounted for 30% of the difference between low and high education groups in overall mortality at age 70+, and for 25% of the difference between lowest and highest household income quintiles. All indicators of socioeconomic position were independently associated with dementia mortality, low household income being the strongest independent predictor (HR=1.24, 95% confidence interval 1.16–1.32), followed by basic education (HR=1.14, 1.06–1.23). Manual occupational social class was related to a 6% higher hazard (HR=1.06, 1.01–1.11) compared to white-collar social class. Adjustment for midlife economic activity, baseline marital status and chronic health conditions attenuated the excess hazard of low midlife household income, although significant effects remained.

**Conclusion** .

1  
2  
3 Several indicators of socioeconomic position predict dementia mortality independently and these  
4 differences persist into the oldest old ages. The results demonstrate that dementia is among the most  
5 important contributors to socioeconomic inequalities in overall mortality at older ages.  
6  
7  
8  
9

### 10 **Strengths and limitations of this study**

- 11 • We used longitudinal registry data that permits a 15-year follow-up of dementia mortality with no  
12 attrition or recall bias.
  - 13 • All indicators of socioeconomic position were measured in midlife in order to avoid selection to  
14 socioeconomic groups on the basis of cognitive decline.
  - 15 • This is the first study to show the contribution of dementia to the socioeconomic inequalities in  
16 overall mortality at older ages.
  - 17 • We used individual death records and could only identify dementia cases that were recorded on the  
18 death certificate.
- 19  
20  
21  
22  
23  
24  
25  
26  
27  
28  
29  
30  
31  
32  
33  
34  
35  
36  
37  
38  
39  
40  
41  
42  
43  
44  
45  
46  
47  
48  
49  
50  
51  
52  
53  
54  
55  
56  
57  
58  
59  
60

## Introduction

Socioeconomic inequality in health and mortality is one of the most consistent findings in the demographic and social epidemiological literature. Lower education, occupational social class and income are strong predictors of all-cause and cause-specific mortality particularly among the working-age population, but inequalities are clear also at older ages (1–4). Among the ageing population, the key factors affecting morbidity and disability are Alzheimer’s disease and other forms of progressive dementia. Globally, an estimated 47 million people lived with dementia in 2015, and the number is projected to triple by 2050 (5). In England and Wales, dementia has already become the leading cause of death (6). Despite the growing societal impact, however, no comprehensive understanding exists about the socioeconomic patterns of dementia mortality.

Educational inequalities in dementia mortality have previously been reported in studies following individuals from midlife or younger old ages (7,8) but also at the oldest ages (8,9). In a Norwegian health examination study, an educational pattern was present only among cohorts aged below 70 at baseline but not among those aged 70 and over. Similarly, among a Finnish cohort aged 90 and over, no statistically significant educational gradient in dementia mortality emerged (9). The lack of educational pattern among the oldest old may relate selective survival, indicating that people surviving to this age is more homogeneous in terms of health-related characteristics. However, the finding may also relate to the fact that the oldest cohorts are relatively homogeneous in terms of education and, thus, other indicators of socioeconomic position may be more suitable in identifying disadvantaged population subgroups among these cohorts (2,10). Moreover, previous studies suggest that among adults in general, overall mortality disparities are greater or have increased to a greater extent in terms of occupational social class (11) and income (12,13) than education. Among the Finnish cohort of nonagenarians (9), occupational social class was a strong predictor of dementia mortality with a 3-fold hazard of dementia death among the unskilled manual workers compared to upper non-manuals. Personal income in midlife was not related to dementia mortality among a cohort of Norwegian men (14). To our knowledge, no previous study has assessed

1  
2  
3 inequalities in dementia mortality by household income, a socioeconomic indicator that is more directly  
4 related to material resources available to the individual and that more rigorously captures the living  
5 conditions of the most disadvantaged population subgroups.  
6  
7  
8

9  
10 This study contributes to the existing knowledge by assessing socioeconomic inequalities in dementia  
11 mortality using multiple indicators of socioeconomic position, including education, occupational social  
12 class and household income. More specifically, the aims of the study were to 1) investigate the magnitude  
13 of socioeconomic inequalities in dementia mortality in relation to age, and compare the patterns to those in  
14 mortality from all other causes of death, 2) to assess the contribution of dementia to the socioeconomic  
15 inequalities in overall mortality at older ages, and 3) to assess whether education, occupational social class  
16 and household income are independently related to dementia mortality once the other indicators are taken  
17 into account. This was because different indicators of socioeconomic position are correlated but each of  
18 them may have independent associations with mortality. In order to capture potential mediating pathways,  
19 we estimated models adjusted for marital status and various chronic health conditions. We used longitudinal  
20 registry data on a large population-based sample, which permits a 15-year follow-up of dementia-related  
21 deaths with no attrition or recall bias. All indicators of socioeconomic position were measured in midlife  
22 in order to avoid selection to socioeconomic groups on the basis of cognitive decline.  
23  
24  
25  
26  
27  
28  
29  
30  
31  
32  
33  
34  
35  
36  
37  
38  
39  
40

## 41 **Methods**

### 42 **Sample**

43  
44 We used an 11% random sample of the Finnish population in 1987–2007 drawn from the Statistics Finland  
45 population register, which covers all permanent residents. Statistics Finland linked the sample with  
46 information from various administrative registers including the national Death Register and healthcare  
47 registers using unique personal identification numbers assigned to all permanent residents.  
48  
49  
50  
51  
52  
53  
54  
55

56 In the present study, we included men and women aged 70–87 at the end of 2000. For these cohorts, midlife  
57 socioeconomic characteristics could be identified using information from the Population Censuses  
58  
59  
60

1  
2  
3 conducted in 1970, 1975, 1980 and 1985. Individuals with missing census information due to residing  
4 outside of Finland (n=920) and those with missing household income information due to institutional  
5 residence (n=401) were excluded. 7 individuals emigrated during the first year of follow-up and thus were  
6 excluded from the analyses. The analytic sample consisted of 54,964 individuals.  
7  
8  
9

### 10 11 12 **Mortality data**

13  
14  
15 Dates and causes of death were obtained from the Death Register. Dementia-related deaths were identified  
16 using the International Classification of Diseases 10<sup>th</sup> revision (ICD-10) codes F00–03 and G30 as the  
17 underlying or any of the three contributory causes of death reported on the death certificate. We identified  
18 11,395 persons who died from dementia and 30,637 persons who died from other causes during the follow-  
19 up in 2001–2016.  
20  
21  
22  
23  
24  
25  
26

### 27 28 **Indicators of socioeconomic position**

29  
30 The information of all indicators of socioeconomic position was derived from the quinquennial population  
31 censuses of 1970–1985. A particular census year was chosen on the basis of the study subject's age so that  
32 the indicators were measured at around the age of 55 (range 53–57) for all. Education was indicated as the  
33 highest achieved qualification, categorised as tertiary (generally 13+ years of education; International  
34 Standard Classification of Education ISCED-1997 codes 5–6), secondary (10–12 years, ISCED 3–4), and  
35 basic education (9 years, ISCED 0–2) or education unknown. Occupational social class comprised five  
36 groups, classified as white collar, manual, self-employed farmer, other self-employed, and unknown. For  
37 non-employed individuals in the census year, we tracked information from previous years. Household  
38 income indicated the taxable annual income of all household members. This includes all income received  
39 in money or monetary benefit subject to tax, therefore excluding tax-free income transfers such as child  
40 benefit, housing allowance and social assistance. The information was obtained from the Finnish Tax  
41 Administration and the Social Insurance Institution of Finland. We adjusted for household composition  
42  
43  
44  
45  
46  
47  
48  
49  
50  
51  
52  
53  
54  
55  
56  
57  
58  
59  
60



1  
2  
3 using the OECD-modified equivalence scale (15). Income quintiles were formed based on the household  
4  
5 income distribution in the population census year.  
6  
7

## 8 **Covariates**

9

10  
11 The analyses incorporated information of economic activity measured from the census year because being  
12  
13 out of the labour market may indicate poor health and affect dementia risk independently but also lead to  
14  
15 reduced household income. Economic activity was classified as being in the labour force, retired and other  
16  
17 inactive. Marital status was measured at baseline (the end of 2000), classified as married, divorced,  
18  
19 widowed and never married. Baseline chronic health conditions included indicators of vascular and lifestyle  
20  
21 risk factors for dementia (16), and were identified from health registers in the five-year period before the  
22  
23 baseline, covering 1996–2000. We used the diagnostic records of the hospital discharge register and patient  
24  
25 censuses of the National Institute for Health and Welfare, and the records of prescription medicine  
26  
27 purchases and of entitlement to special reimbursement for the medication expenses for certain chronic  
28  
29 diseases maintained by the Social Insurance Institution of Finland. We included indicators for alcohol-  
30  
31 related diseases and accidental poisoning by alcohol (ICD-10 codes F10–19, G31.2, G40.51, G62.1, G72.1,  
32  
33 I42.6, K29.2, K70, K86.0, O35.4, X45), asthma and other chronic obstructive pulmonary disease (COPD)  
34  
35 (ICD-10 codes J43–46, Finnish disease category code 203), diabetes (ICD-10 codes E10–14, Anatomical  
36  
37 Therapeutic Chemical (ATC) codes A10, Finnish disease category code 103), heart disease (ICD-10 codes  
38  
39 I00–09 and I20–52, Finnish disease category codes 201, 206 and 207) and stroke (ICD-10 codes I60–66  
40  
41 and G45). To account for potential regional variance in socioeconomic characteristics and mortality, we  
42  
43 included dummies for region of residence (Western Finland, Helsinki capital region, rest of Southern  
44  
45 Finland, Eastern Finland, and Lapland). The variable accounting for the degree of urbanisation of the  
46  
47 municipality of residence was based on the proportion of population living in urban settlements and the  
48  
49 population of the largest urban settlement in the municipality (urban, semi-urban and rural).  
50  
51  
52  
53  
54  
55  
56  
57  
58  
59  
60

### Statistical analyses

We followed the study population for dementia mortality from 1 January 2001 until 31 December 2016. Individuals were censored on the date of death, the end of the year preceding emigration, or at the end of 2016, whichever came first.

For descriptive statistics, we calculated age-adjusted dementia mortality rates per 10,000 person-years by indicators of socioeconomic position, economic activity, marital status and chronic health conditions. In order to assess the magnitude of socioeconomic inequalities in relation to age, we estimated Kaplan–Meier survival functions by education, occupational social class and household income. In these analyses, we contrasted the survival functions of the highest and lowest education groups, white-collar employees and manual workers and the highest and lowest household income quintiles. The equality of survival functions was tested using log-rank tests. For the comparison between dementia mortality and the more general mortality patterns, separate Kaplan-Meier survival functions were estimated for mortality from all other causes of death.

To assess the contribution of dementia mortality to socioeconomic differences in overall mortality, we calculated absolute rate differences in dementia and total mortality between socioeconomic groups (basic vs. tertiary education, manual vs. white-collar occupational social class, lowest vs. highest household income quintile). The contribution was determined by the rate difference in dementia mortality as a percentage of the rate difference in total mortality. The rate differences by indicators of socioeconomic position and age are shown in Supplementary Table 1.

To estimate the independent associations between each indicator of socioeconomic position and dementia mortality, we used Cox regression models. Attained age in years was used as the time scale, and thus all analyses adjusted for the confounding effect of age (17). We first estimated crude associations between each indicator and dementia mortality, adjusting for calendar year dummies, gender, region of residence and the degree of urbanisation (model 1). Model 2 included education, occupational social class and household

1  
2  
3 income as covariates, thus showing mutually adjusted associations. Midlife economic activity was adjusted  
4  
5 for in model 3. We further adjusted for baseline marital status and chronic health conditions in model 4 to  
6  
7 assess the extent to which these factors attenuated the relative hazard attached to each socioeconomic  
8  
9 indicator.

10  
11  
12 We tested for interactions between gender and each socioeconomic indicator using likelihood ratio test.  
13  
14 Interactions were statistically nonsignificant ( $p>0.05$ ), and thus we conducted all analyses for men and  
15  
16 women combined. We also tested for interactions of all pairwise combinations of the socioeconomic  
17  
18 indicators, adjusting for the covariates of model 1. These interactions were all statistically non-significant  
19  
20 ( $p>0.05$ ). All analyses were performed using Stata 15.1 (18).

### 21 22 23 24 25 **Patient and public involvement**

26  
27  
28 No patients were involved in setting the research question or the outcome measures, nor were they involved  
29  
30 in developing plans for design or implementation of the study. No patients were asked to advise on  
31  
32 interpretation or writing up of results. There are no plans to disseminate the results of the research to study  
33  
34 participants or the relevant patient community.

### 35 36 37 38 **Results**

39  
40 Table 1 shows the distribution of the study population by indicators of midlife socioeconomic position,  
41  
42 economic activity and baseline characteristics. The vast majority of individuals (77.2%) had no higher than  
43  
44 basic education, and manual employees formed the largest occupational social class (43.6%). Higher  
45  
46 household income quintiles were over-represented among the study population due to greater mortality of  
47  
48 the lower income groups between the time of measurement of midlife income and the baseline. During the  
49  
50 528 387 person-years at risk 11 395 individuals died from dementia, the average age-adjusted dementia  
51  
52 mortality rate being 191.2 and 228.1 per 10,000 person-years among men and women, respectively. The  
53  
54 rate was higher for those with lower education, occupational social class and household income, and also  
55  
56 for the non-married and people with chronic health conditions apart from asthma and other COPD.  
57  
58  
59  
60

1  
2  
3 *[Insert Table 1 about here]*  
4  
5

6 Kaplan–Meier survival functions in Figure 1 show that dementia mortality differed by all indicators of  
7 socioeconomic position (log rank test,  $p < 0.001$  for each indicator), and that the age patterns differed  
8 between the indicators. The inequalities emerged at an earlier age when socioeconomic position was  
9 measured in terms of household income (Panel C) compared to education (Panel A) and occupational social  
10 class (Panel B). At the oldest old ages, by contrast, the differences were more pronounced when  
11 socioeconomic position was measured in terms of education and occupational social class. Nevertheless,  
12 inequalities in dementia mortality emerged substantially later in life compared to mortality from all other  
13 causes. Socioeconomic inequalities in mortality from other causes diminished after the age of 95, whereas  
14 inequalities in dementia mortality in terms of education persisted to the oldest old age and even increased  
15 after the age of 95.  
16  
17  
18  
19  
20  
21  
22  
23  
24  
25  
26  
27  
28  
29

30 *[Insert Figure 1 about here]*  
31

32 Table 2 shows that dementia contributed to 25–30% of educational and household income differences in  
33 overall mortality at the age of 70+. Dementia contributed less to occupational social class differences (12%).  
34 The contribution of dementia to the excess mortality in the low educational and household income groups  
35 increased substantially with age.  
36  
37  
38  
39  
40  
41

42 *[Insert Table 2 about here]*  
43  
44

45 All indicators of midlife socioeconomic position were associated with dementia mortality in Cox regression  
46 models (Table 3, model 1). The associations were strongest for basic education (hazard ratio [HR]=1.23,  
47 95% CI 1.15–1.32), unknown occupational social class (HR=1.20, 1.00–1.44), and the lowest household  
48 income quintile (HR=1.28, 1.20–1.35). Mutual adjustment of socioeconomic indicators in model 2  
49 attenuated educational differences by about 40%, and unknown occupational social class to a non-  
50 significant level. Basic education (HR=1.14, 1.06–1.23), manual occupational social class (HR=1.06, 1.01–  
51 1.11) and three lowest household income quintiles (for the lowest quintile HR=1.24, 1.16–1.32) all  
52  
53  
54  
55  
56  
57  
58  
59  
60

1  
2  
3 predicted dementia mortality independently of each other. Adjustment for midlife economic activity in  
4  
5 model 3 attenuated the excess hazard particularly of the lower household income quintiles. Adjustment for  
6  
7 baseline marital status and chronic health conditions in model 4 contributed to a small change in the  
8  
9 estimates, the attenuation being largest for the lowest household income quintile. In this full model, basic  
10  
11 education increased the hazard of dementia death by 14% (1.05–1.22), manual occupational social class by  
12  
13 5% (1.00–1.11) and the two lowest household income quintiles by 7–13% (HR=1.07, 1.00–1.14 to HR=1.13,  
14  
15 1.06–1.21).

16  
17  
18  
19  
20 *[Insert Table 3 about here]*  
21  
22

## 23 **Discussion**

### 24 25 **Main findings and their interpretation**

26  
27  
28 In this study we have shown that dementia mortality at older ages is socioeconomically patterned. People  
29  
30 with lower education, occupational social class and household income have a higher risk of dementia death  
31  
32 compared to those with higher socioeconomic position. These results add to the literature on socioeconomic  
33  
34 inequalities in old-age mortality, which have previously shown a socioeconomic pattern in many other  
35  
36 specific causes of death such as cardiovascular diseases, COPD and cancer (1). Our results indicate,  
37  
38 moreover, that dementia is an important factor in overall socioeconomic inequalities in old-age mortality,  
39  
40 contributing to 25–30% of educational and household income differences in total mortality among the  
41  
42 population aged 70 and over. The contribution of dementia to overall socioeconomic inequalities in  
43  
44 mortality increased substantially with age, which relates to the fact that the proportion of deaths attributable  
45  
46 to dementia also increases with age (19).

47  
48  
49 A major difference in the patterns between dementia mortality and mortality from all other causes of death  
50  
51 was that socioeconomic inequalities in dementia mortality emerged later, were smaller and persisted in the  
52  
53 same magnitude to the oldest old ages. Inequalities in mortality from other causes of death, instead, tended  
54  
55 to diminish after the age of 95. The attenuation of socioeconomic inequalities with age is a general finding  
56  
57  
58  
59  
60

1  
2  
3 (1,2), and may partly relate to selective survival, suggesting that people who survive to very old age have  
4 more similar health profiles across socioeconomic groups. Our results show, however, that even among  
5 people who survive to the oldest old age, socioeconomic groups differ in neurological health. This is a  
6 novel finding in that previous studies have identified consistent socioeconomic inequalities in dementia  
7 mortality only among the younger old (7,8) but the results have been mixed for the oldest old (8,9).  
8 Participation bias may at least partly explain the differences in findings; people of older age, lower  
9 socioeconomic position and health problems are less likely to participate in surveys and studies involving  
10 health examinations. Our study employed register data on a population-based cohort and thus is not affected  
11 by participation or attrition biases.  
12  
13  
14  
15  
16  
17  
18  
19  
20  
21  
22  
23

24 The age patterns in dementia mortality differed between indicators of socioeconomic position: while  
25 educational and occupational social class differences were more pronounced among the oldest old, the  
26 differences among the younger old were largest when socioeconomic position was measured in terms of  
27 household income. The lowest midlife household income quintiles represent the most disadvantaged  
28 population groups with multiple dementia risk factors. A low household income may be accompanied by  
29 impoverished living conditions and greater psychosocial stress, increasing the risk of chronic diseases  
30 directly or through less favourable health behaviours. Our findings show that the higher dementia mortality  
31 of the lowest midlife household income quintiles was strongly related to greater morbidity and early  
32 retirement of these groups. We cannot rule out the possibility, however, that people who died from dementia  
33 at younger old ages experienced cognitive decline already in midlife to the extent that affected their labour  
34 market participation and household income.  
35  
36  
37  
38  
39  
40  
41  
42  
43  
44  
45  
46  
47  
48  
49

50 Education, in turn, may have particular benefits above and beyond physical health factors among the  
51 population surviving to the oldest old age. Our results show widening educational differences in dementia  
52 mortality after the age of 95, and the association was not related to chronic health conditions or marital  
53 status at baseline. Education is a well-established predictor of dementia incidence (20), although the exact  
54 mechanisms are still not known. Brain autopsy studies indicate, in line with the cognitive reserve hypothesis  
55  
56  
57  
58  
59  
60

1  
2  
3 (21), that education is not associated with the burden of neuropathology at death but higher education  
4 enables individuals to compensate longer for the neuropathological changes before developing clinical  
5 symptoms of dementia (22). Thus, it is possible that the educational differences in dementia mortality we  
6 found in our study are due to competing risks; people with higher education died from other causes before  
7 they reached the phase of clinical dementia or died from other causes before dementia progressed to death.  
8 However, the empirical evidence for the cognitive reserve hypothesis remains open to debate. For example,  
9 multiple studies have not identified educational differences in survival time after dementia onset (23),  
10 which is among the key hypotheses in the cognitive reserve model (24). Therefore, it is plausible that higher  
11 education truly enhances brain health and protects against the development of neurodegenerative disorders.

12  
13  
14  
15  
16  
17  
18  
19  
20  
21  
22  
23  
24 We used a unique population-representative sample of older adults in Finland with 11,395 dementia deaths  
25 identified from the National Death Register. The register-based sample was not affected by participation or  
26 attrition bias, which are common limitations of many cohort designs, particularly among the older  
27 population. The population register encompasses rich information on demographic and socioeconomic  
28 characteristics of individuals over the life course, and is not subject to bias from individuals' self-reports  
29 or recollection.

30  
31  
32  
33  
34  
35  
36  
37  
38  
39  
40  
41  
42  
43  
44  
45  
46  
47  
48  
49  
50  
51  
52  
53  
54  
55  
56  
57  
58  
59  
60  
Despite the rich register data, our study also has some limitations. First, we could only identify cases that  
have been recorded on the death certificate. To minimise any bias arising from potential underreporting of  
dementia as the underlying cause of death, we applied the multiple-cause approach and included also cases  
where dementia was recorded as any of the three contributory causes (25). According to a validation study  
for identifying dementia and Alzheimer's disease in the Finnish national registers, the documentation of  
dementia as the cause of death has improved since the late 1990s, and the specificity is particularly high  
(26). Furthermore, we ran sensitivity analyses with interaction with calendar year, and found that the  
associations between the indicators of socioeconomic position and dementia mortality did not vary in time.  
Therefore, we believe our results are not biased by possible changes in documentation practices.

1  
2  
3 Second, the causal relationship between socioeconomic position and dementia is difficult to establish in  
4 observational studies. We therefore measured all socioeconomic characteristics 15–30 years before the  
5 mortality follow-up, and it is thus very unlikely that any symptoms of dementia affected the midlife  
6 socioeconomic attainment of individuals. Nevertheless, we cannot exclude the possibility that early  
7 cognitive decline may have affected midlife socioeconomic position, especially measured in term of  
8 occupational social class and household income.  
9  
10  
11  
12  
13  
14  
15  
16

## 17 **Conclusions**

18  
19  
20 This study provides new insight into the socioeconomic inequalities in old-age mortality by showing a  
21 consistent socioeconomic pattern in dementia mortality that persists to the oldest old ages. Low education,  
22 occupational social class and household income were all associated with higher risk of dementia death,  
23 although the socioeconomic differences emerged later and were smaller than in mortality from other causes.  
24 Household income differences in dementia mortality were more pronounced among the younger old, and  
25 the associations were largely attributable to other chronic health conditions such as diabetes and stroke.  
26 Educational inequalities, by contrast, were independent of chronic health conditions and became more  
27 pronounced at the oldest old age where mortality inequalities generally begin to attenuate. The findings  
28 suggest that dementia contributes to socioeconomic inequalities in overall mortality at older ages and, thus,  
29 dementia prevention is important also from the point of view of socioeconomic inequalities in mortality.  
30  
31  
32  
33  
34  
35  
36  
37  
38  
39  
40  
41  
42  
43  
44  
45  
46  
47  
48  
49  
50  
51  
52  
53  
54  
55  
56  
57  
58  
59  
60



## REFERENCES

1. Huisman M, Kunst AE, Bopp M, et al. Educational inequalities in cause-specific mortality in middle-aged and older men and women in eight western European populations. *The Lancet*. 2005;365(9458):493–500.
2. Huisman M, Read S, Towriss CA, et al. Socioeconomic Inequalities in Mortality Rates in Old Age in the World Health Organization Europe Region. *Epidemiol Rev*. 2013;35(1):84–97.
3. Marmot MG, Shipley MJ. Do socioeconomic differences in mortality persist after retirement? 25 Year follow up of civil servants from the first Whitehall study. *BMJ*. 1996;313(7066):1177–1180.
4. Demakakos P, Biddulph JP, Bobak M, et al. Wealth and mortality at older ages: a prospective cohort study. *J Epidemiol Community Health*. 2016;70(4):346–353.
5. Prince M, Wimo A, Guerchet M, et al. World Alzheimer Report 2015—The Global Impact of Dementia: an analysis of prevalence, incidence, cost and trends. 2015;(https://www.alz.co.uk/research/WorldAlzheimerReport2015.pdf). (Accessed September 13, 2017)
6. Office for National Statistics. Deaths registered in England and Wales (series DR): 2016. 2017;(https://www.ons.gov.uk/peoplepopulationandcommunity/birthsdeathsandmarriages/deaths/bulletins/deathsregisteredinenglandandwalesseriesdr/2016#dementia-and-alzheimer-disease-remained-the-leading-cause-of-death-in-2016)
7. Russ TC, Stamatakis E, Hamer M, et al. Socioeconomic status as a risk factor for dementia death: individual participant meta-analysis of 86 508 men and women from the UK. *The British journal of psychiatry*. 2013;203(1):10–17.
8. Strand BH, Langballe EM, Rosness TA, et al. Age, education and dementia related deaths. The Norwegian Counties Study and the Cohort of Norway. *Journal of the neurological sciences*. 2014;345(1):75–82.
9. Enroth L, Raitanen J, Hervonen A, et al. Is socioeconomic status a predictor of mortality in nonagenarians? The vitality 90+ study. *Age and ageing*. 2014;44(1):123–129.
10. Martelin T. Mortality by indicators of socioeconomic status among the Finnish elderly. *Social science & medicine*. 1994;38(9):1257–1278.
11. Martikainen P, Blomgren J, Valkonen T. Change in the total and independent effects of education and occupational social class on mortality: analyses of all Finnish men and women in the period 1971–2000. *Journal of Epidemiology & Community Health*. 2007;61(6):499–505.
12. Rognerud MA, Zahl P-H. Social inequalities in mortality: changes in the relative importance of income, education and household size over a 27-year period. *The European Journal of Public Health*. 2005;16(1):62–68.
13. Geyer S, Hemström Ö, Peter R, et al. Education, income, and occupational class cannot be used interchangeably in social epidemiology. Empirical evidence against a common practice. *Journal of Epidemiology & Community Health*. 2006;60(9):804–810.

14. Strand BH, Skirbekk V, Rosness TA, et al. Income in midlife and dementia related mortality over three decades: A Norwegian prospective study. *eNeurologicalSci*. 2015;1(2):24–29.
15. OECD. OECD Framework for Statistics on the Distribution of Household Income, Consumption and Wealth. Paris: OECD Publishing; 2013 (Accessed May 3, 2018).(<http://dx.doi.org/10.1787/9789264194830-en>). (Accessed May 3, 2018)
16. Baumgart M, Snyder HM, Carrillo MC, et al. Summary of the evidence on modifiable risk factors for cognitive decline and dementia: a population-based perspective. *Alzheimer's & dementia: the journal of the Alzheimer's Association*. 2015;11(6):718–726.
17. Lamarca R, Alonso J, Gómez G, et al. Left-truncated data with age as time scale: an alternative for survival analysis in the elderly population. *The Journals of Gerontology Series A: Biological Sciences and Medical Sciences*. 1998;53(5):M337–M343.
18. StataCorp. Stata Statistical Software: Release 15. College Station, TX: StataCorp LLC. 2017;
19. Knapp M, Prince M, Albanese E, et al. Dementia UK: The full report. London: Alzheimer's Society; 2007.
20. Livingston G, Sommerlad A, Orgeta V, et al. Dementia prevention, intervention, and care. *The Lancet* [electronic article]. 2017;(https://tbhtoolkits.com/media/Dementia-Prevention-Intervention-and-Care-Lancet-2017-1.pdf). (Accessed September 11, 2017)
21. Stern Y. What is cognitive reserve? Theory and research application of the reserve concept. *Journal of the International Neuropsychological Society*. 2002;8(3):448–460.
22. Brayne C, Ince PG, Keage HA, et al. Education, the brain and dementia: neuroprotection or compensation? ECLIPSE Collaborative Members. *Brain*. 2010;133(8):2210–2216.
23. Paradise M, Cooper C, Livingston G. Systematic review of the effect of education on survival in Alzheimer's disease. *International psychogeriatrics*. 2009;21(1):25–32.
24. Stern Y, Tang MX, Denaro J, et al. Increased risk of mortality in Alzheimer's disease patients with more advanced educational and occupational attainment. *Annals of Neurology: Official Journal of the American Neurological Association and the Child Neurology Society*. 1995;37(5):590–595.
25. Garcia-Ptacek S, Kåreholt I, Cermakova P, et al. Causes of Death According to Death Certificates in Individuals with Dementia: A Cohort from the Swedish Dementia Registry. *Journal of the American Geriatrics Society*. 2016;64(11).
26. Solomon A, Ngandu T, Soininen H, et al. Validity of dementia and Alzheimer's disease diagnoses in Finnish national registers. *Alzheimer's & Dementia*. 2014;10(3):303–309.

## Footnotes

**Contributors:** All authors participated in designing the study, generating hypotheses, interpreting the data and critically revised the manuscript for important intellectual content. KK analysed the data, conducted the literature review and wrote the first draft of the manuscript.

**Funding:** KK was supported by the Eino Jutikkala Fund. PM was supported by the Academy of Finland, and the Strategic Research Council PROMEQ project (#303615). PM was also supported by the European Union Horizon2020 Programme under grant agreement n° 667661 (Promoting mental wellbeing in the ageing population - MINDMAP). The study does not necessarily reflect the Commission's views and in no way anticipates the Commission's future policy in this area. The funders had no role in study design, data collection and analysis, decision to publish, or preparation of the manuscript.

**Competing interests:** None declared.

**Data sharing statement:** Statistics Finland, the National Institute for Health and Welfare and the Social Insurance Institution of Finland have collected and own the data. Due to data protection regulations, the authors are not allowed to make the data available to third parties. Researchers can apply for data access by contacting the register-holding institutions: Statistics Finland ([http://stat.fi/index\\_en.html](http://stat.fi/index_en.html)); National Institute for Health and Welfare (<https://thl.fi/en>); Social Insurance Institution of Finland (<https://www.kela.fi/web/en>).

**Ethics approval:** The study has been approved by Statistics Finland Board of Ethics (permit TK-53-339-13). The data were collected for routine administrative registration purposes and, therefore, informed consent of the participants was not obtained. These register data can be used for scientific purposes under the Personal Data Act and the Statistics Act. Statistics Finland anonymised the data prior to providing them to researchers.

**Table 1.** Distribution of the study population, dementia deaths and age-adjusted dementia mortality rates (per 10,000 person-years) by indicators of socioeconomic position and other characteristics, Finnish men and women in 2001–2016

|                           | N          | %    | Dementia deaths |       |             |
|---------------------------|------------|------|-----------------|-------|-------------|
|                           |            |      | n               | Rate  | 95% CI      |
| Mean age at baseline (SD) | 76.4 (4.8) |      |                 |       |             |
| Gender                    |            |      |                 |       |             |
| Men                       | 20100      | 36.6 | 3409            | 191.2 | 184.9–197.8 |
| Women                     | 34864      | 63.4 | 7986            | 228.1 | 223.1–233.2 |
| Education                 |            |      |                 |       |             |
| Tertiary                  | 5445       | 9.9  | 1014            | 178.7 | 168.0–190.1 |
| Secondary                 | 7074       | 12.9 | 1446            | 200.3 | 190.2–210.9 |
| Basic                     | 42445      | 77.2 | 8936            | 223.7 | 219.1–228.4 |
| Occupational social class |            |      |                 |       |             |
| White-collar              | 17015      | 31.0 | 3524            | 200.1 | 193.6–206.8 |
| Manual                    | 23951      | 43.6 | 4882            | 216.8 | 210.8–223.0 |
| Farmer                    | 10204      | 18.6 | 2211            | 242.0 | 232.1–252.3 |
| Other self-employed       | 3271       | 6.0  | 657             | 208.6 | 193.2–225.1 |
| Unknown                   | 523        | 1.0  | 121             | 289.2 | 242.0–345.6 |
| Household income          |            |      |                 |       |             |
| Highest quintile          | 13667      | 24.9 | 2715            | 194.0 | 186.9–201.5 |
| 2nd                       | 10522      | 19.1 | 2098            | 201.9 | 193.5–210.8 |
| 3rd                       | 10110      | 18.4 | 2114            | 217.5 | 208.4–227.0 |
| 4th                       | 10292      | 18.7 | 2183            | 224.3 | 215.1–233.9 |
| Lowest quintile           | 10373      | 18.9 | 2285            | 253.8 | 243.6–264.4 |
| Economic activity         |            |      |                 |       |             |
| Active                    | 37266      | 67.8 | 7585            | 208.1 | 203.4–212.8 |
| Retired                   | 8881       | 16.2 | 1742            | 219.2 | 209.1–229.7 |
| Other inactive            | 8817       | 16.0 | 2068            | 245.2 | 234.9–256.0 |
| Marital status            |            |      |                 |       |             |
| Married                   | 24789      | 45.1 | 4471            | 175.5 | 170.4–180.7 |
| Divorced                  | 4056       | 7.4  | 797             | 204.6 | 190.8–219.3 |
| Widowed                   | 20997      | 38.2 | 5000            | 265.8 | 258.5–273.2 |
| Never married             | 5122       | 9.3  | 1127            | 242.3 | 228.6–256.9 |
| Chronic health conditions |            |      |                 |       |             |
| Alcohol-related diseases  | 308        | 0.6  | 68              | 329.9 | 260.1–418.4 |
| Asthma and COPD           | 4510       | 8.2  | 789             | 206.9 | 192.9–221.8 |
| Diabetes                  | 6714       | 12.2 | 1240            | 243.7 | 230.5–257.6 |
| Heart disease             | 18094      | 32.9 | 3562            | 244.5 | 236.6–252.6 |

|                          |       |       |       |       |             |
|--------------------------|-------|-------|-------|-------|-------------|
| Stroke                   | 3180  | 5.8   | 685   | 328.3 | 304.6–353.8 |
| Region of residence      |       |       |       |       |             |
| Western Finland          | 25078 | 45.6  | 4979  | 206.0 | 200.3–211.8 |
| Helsinki capital region  | 7449  | 13.6  | 1582  | 218.0 | 207.5–229.0 |
| Rest of Southern Finland | 12056 | 21.9  | 2464  | 213.8 | 205.6–222.5 |
| Eastern Finland          | 8458  | 15.4  | 1916  | 238.9 | 228.4–249.8 |
| Lapland                  | 1923  | 3.5   | 454   | 243.6 | 222.2–267.1 |
| Degree of urbanisation   |       |       |       |       |             |
| Urban                    | 29853 | 51.0  | 6401  | 221.3 | 215.9–226.8 |
| Semi-urban               | 9285  | 17.7  | 1831  | 205.4 | 196.2–215.0 |
| Rural                    | 15826 | 31.3  | 3163  | 210.9 | 203.7–218.4 |
| Total                    | 54964 | 100.0 | 11395 | 215.7 | 211.7–219.7 |

Abbreviations: CI, confidence intervals; COPD, chronic obstructive pulmonary diseases

**Table 2.** The contribution (%) of dementia to socioeconomic differences in total mortality by indicator of socioeconomic position and age, Finnish men and women in 2001–2016

|                                        | 70-79 | 80-89 | 90+  | All ages<br>70+ |
|----------------------------------------|-------|-------|------|-----------------|
| Education <sup>a</sup>                 | 8.6   | 31.7  | 52.9 | 29.9            |
| Occupational social class <sup>b</sup> | 6.4   | 19.5  | 19.8 | 12.0            |
| Household income <sup>c</sup>          | 13.3  | 22.2  | 35.0 | 24.0            |

<sup>a</sup> Tertiary vs. basic education

<sup>b</sup> White-collar vs. manual occupational social class

<sup>c</sup> Highest vs. lowest household income quintiles

**Table 2.** Hazard ratios and 95% confidence intervals for dementia mortality by indicators of socioeconomic position, Finnish men and women in 2001–2016, n=54,964

| Indicator of socioeconomic position | Model 1 <sup>a</sup> |           | Model 2 <sup>b</sup> |           | Model 3 <sup>c</sup> |           | Model 4 <sup>d</sup> |           |
|-------------------------------------|----------------------|-----------|----------------------|-----------|----------------------|-----------|----------------------|-----------|
|                                     | HR                   | 95% CI    | HR                   | 95% CI    | HR                   | 95% CI    | HR                   | 95% CI    |
| Education                           |                      |           |                      |           |                      |           |                      |           |
| Tertiary                            | 1.00                 |           | 1.00                 |           | 1.00                 |           | 1.00                 |           |
| Secondary                           | 1.14                 | 1.05–1.23 | 1.08                 | 0.99–1.17 | 1.08                 | 0.99–1.17 | 1.08                 | 0.99–1.17 |
| Basic                               | 1.23                 | 1.15–1.32 | 1.14                 | 1.06–1.23 | 1.14                 | 1.05–1.22 | 1.14                 | 1.05–1.22 |
| Occupational social class           |                      |           |                      |           |                      |           |                      |           |
| White collar                        | 1.00                 |           | 1.00                 |           | 1.00                 |           | 1.00                 |           |
| Manual                              | 1.14                 | 1.09–1.20 | 1.06                 | 1.01–1.11 | 1.05                 | 1.00–1.11 | 1.05                 | 1.00–1.11 |
| Farmer                              | 1.08                 | 1.02–1.15 | 0.96                 | 0.90–1.03 | 0.97                 | 0.91–1.04 | 0.98                 | 0.92–1.05 |
| Other self-employed                 | 1.05                 | 0.96–1.14 | 0.98                 | 0.90–1.07 | 0.99                 | 0.91–1.08 | 1.00                 | 0.92–1.09 |
| Unknown                             | 1.20                 | 1.00–1.44 | 1.04                 | 0.87–1.25 | 0.94                 | 0.78–1.14 | 0.94                 | 0.78–1.14 |
| Household income                    |                      |           |                      |           |                      |           |                      |           |
| Highest quintile                    | 1.00                 |           | 1.00                 |           | 1.00                 |           | 1.00                 |           |
| 2nd                                 | 1.08                 | 1.02–1.14 | 1.04                 | 0.98–1.10 | 1.03                 | 0.98–1.10 | 1.02                 | 0.96–1.09 |
| 3rd                                 | 1.13                 | 1.07–1.20 | 1.08                 | 1.02–1.15 | 1.07                 | 1.00–1.14 | 1.05                 | 0.99–1.12 |
| 4th                                 | 1.17                 | 1.10–1.24 | 1.13                 | 1.06–1.20 | 1.10                 | 1.03–1.17 | 1.07                 | 1.00–1.14 |
| Lowest quintile                     | 1.28                 | 1.20–1.35 | 1.24                 | 1.16–1.32 | 1.18                 | 1.10–1.26 | 1.13                 | 1.06–1.21 |

Abbreviations: CI, confidence interval; HR, hazard ratio

All models used age as time scale and adjusted for calendar year, gender, region of residence and the degree of urbanisation

<sup>a</sup>Model 1: each indicator of socioeconomic position separately

<sup>b</sup>Model 2: indicators of socioeconomic position mutually adjusted

<sup>c</sup>Model 3: model 2 + midlife economic activity

<sup>d</sup>Model 4: model 3 + baseline marital status and chronic health conditions (alcohol-related diseases, asthma and chronic obstructive pulmonary disease, diabetes, heart disease and stroke)

1  
2  
3  
4  
5  
6  
7  
8  
9  
10  
11  
12  
13  
14  
15  
16  
17  
18  
19  
20  
21  
22  
23  
24  
25  
26  
27  
28  
29  
30  
31  
32  
33  
34  
35  
36  
37  
38  
39  
40  
41  
42  
43  
44  
45  
46  
47  
48  
49  
50  
51  
52  
53  
54  
55  
56  
57  
58  
59  
60

**Figure 1.** Kaplan–Meier survival probabilities for dementia mortality and mortality from all other causes of death by a) education, b) occupational social class and c) household income quintile (Q1=highest, Q5=lowest), Finnish men and women in 2001–2012

For peer review only

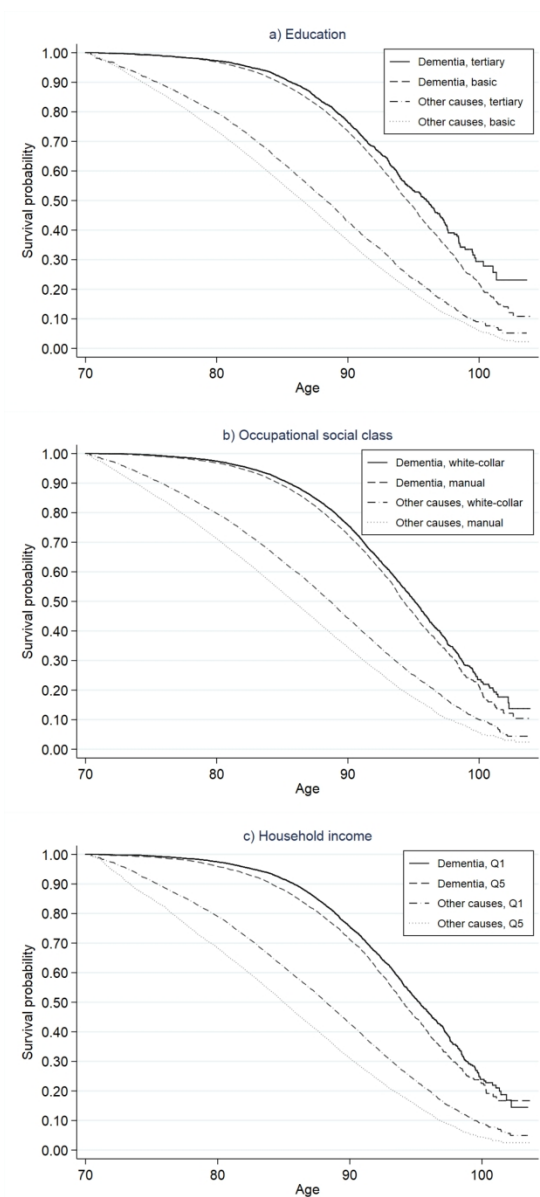

Figure 1. Kaplan–Meier survival probabilities for dementia mortality and mortality from all other causes of death by a) education, b) occupational social class and c) household income quintile (Q1=highest, Q5=lowest), Finnish men and women in 2001–2012



**Supplementary Table 1** Differences in mortality rates (per 10,000 person-years) by cause of death, and the contribution of each cause of death (%) to differences in total mortality by indicator of socioeconomic position and age

|                                              | 70–79           |                  | 80–89           |                  | 90+             |                  |
|----------------------------------------------|-----------------|------------------|-----------------|------------------|-----------------|------------------|
|                                              | Rate difference | Contribution (%) | Rate difference | Contribution (%) | Rate difference | Contribution (%) |
| <b>Education<sup>a</sup></b>                 |                 |                  |                 |                  |                 |                  |
| Dementia                                     | 9.1             | 8.6              | 40.4            | 31.7             | 152.4           | 52.9             |
| Other causes                                 | 97.3            | 91.4             | 86.9            | 68.3             | 135.6           | 47.1             |
| Total mortality                              | 106.4           | 100.0            | 127.2           | 100.0            | 288.0           | 100.0            |
| <b>Occupational social class<sup>b</sup></b> |                 |                  |                 |                  |                 |                  |
| Dementia                                     | 7.8             | 6.4              | 33.0            | 19.5             | 49.1            | 19.8             |
| Other causes                                 | 114.2           | 93.6             | 136.1           | 80.5             | 199.3           | 80.2             |
| Total mortality                              | 122.0           | 100.0            | 169.1           | 100.0            | 248.5           | 100.0            |
| <b>Household income<sup>c</sup></b>          |                 |                  |                 |                  |                 |                  |
| Dementia                                     | 23.5            | 13.3             | 49.4            | 22.2             | 127.8           | 35.0             |
| Other causes                                 | 152.9           | 86.7             | 173.3           | 77.8             | 237.4           | 65.0             |
| Total mortality                              | 176.4           | 100.0            | 222.7           | 100.0            | 365.2           | 100.0            |

<sup>a</sup> Tertiary vs. basic education

<sup>b</sup> White-collar vs. manual occupational social class

<sup>c</sup> Highest vs. lowest household income quintiles

STROBE Statement—Checklist of items that should be included in reports of *cohort studies*

|                              | Item No | Recommendation                                                                                                                                                                                                                                                                                                         | Page No                    |
|------------------------------|---------|------------------------------------------------------------------------------------------------------------------------------------------------------------------------------------------------------------------------------------------------------------------------------------------------------------------------|----------------------------|
| <b>Title and abstract</b>    | 1       | (a) Indicate the study's design with a commonly used term in the title or the abstract<br>(b) Provide in the abstract an informative and balanced summary of what was done and what was found                                                                                                                          | 1<br>2-3                   |
| <b>Introduction</b>          |         |                                                                                                                                                                                                                                                                                                                        |                            |
| Background/rationale         | 2       | Explain the scientific background and rationale for the investigation being reported                                                                                                                                                                                                                                   | 4                          |
| Objectives                   | 3       | State specific objectives, including any prespecified hypotheses                                                                                                                                                                                                                                                       | 5                          |
| <b>Methods</b>               |         |                                                                                                                                                                                                                                                                                                                        |                            |
| Study design                 | 4       | Present key elements of study design early in the paper                                                                                                                                                                                                                                                                | 5-6                        |
| Setting                      | 5       | Describe the setting, locations, and relevant dates, including periods of recruitment, exposure, follow-up, and data collection                                                                                                                                                                                        | 5-6                        |
| Participants                 | 6       | (a) Give the eligibility criteria, and the sources and methods of selection of participants. Describe methods of follow-up<br>(b) For matched studies, give matching criteria and number of exposed and unexposed                                                                                                      | 5-6                        |
| Variables                    | 7       | Clearly define all outcomes, exposures, predictors, potential confounders, and effect modifiers. Give diagnostic criteria, if applicable                                                                                                                                                                               | 6-7                        |
| Data sources/<br>measurement | 8*      | For each variable of interest, give sources of data and details of methods of assessment (measurement). Describe comparability of assessment methods if there is more than one group                                                                                                                                   | 6-7                        |
| Bias                         | 9       | Describe any efforts to address potential sources of bias                                                                                                                                                                                                                                                              | 8-9                        |
| Study size                   | 10      | Explain how the study size was arrived at                                                                                                                                                                                                                                                                              | 5-6                        |
| Quantitative variables       | 11      | Explain how quantitative variables were handled in the analyses. If applicable, describe which groupings were chosen and why                                                                                                                                                                                           | 6-9                        |
| Statistical methods          | 12      | (a) Describe all statistical methods, including those used to control for confounding<br>(b) Describe any methods used to examine subgroups and interactions<br>(c) Explain how missing data were addressed<br>(d) If applicable, explain how loss to follow-up was addressed<br>(e) Describe any sensitivity analyses | 8-9<br>9<br>5-6<br>8<br>13 |
| <b>Results</b>               |         |                                                                                                                                                                                                                                                                                                                        |                            |
| Participants                 | 13*     | (a) Report numbers of individuals at each stage of study—eg numbers potentially eligible, examined for eligibility, confirmed eligible, included in the study, completing follow-up, and analysed<br>(b) Give reasons for non-participation at each stage<br>(c) Consider use of a flow diagram                        | 9<br>9                     |
| Descriptive data             | 14*     | (a) Give characteristics of study participants (eg demographic, clinical, social) and information on exposures and potential confounders<br>(b) Indicate number of participants with missing data for each variable of interest<br>(c) Summarise follow-up time (eg, average and total amount)                         | 9                          |
| Outcome data                 | 15*     | Report numbers of outcome events or summary measures over time                                                                                                                                                                                                                                                         | 9                          |

|    |                          |                                                                                                                  |                                                                                                                                                                                                              |       |
|----|--------------------------|------------------------------------------------------------------------------------------------------------------|--------------------------------------------------------------------------------------------------------------------------------------------------------------------------------------------------------------|-------|
| 1  | Main results             | 16                                                                                                               | (a) Give unadjusted estimates and, if applicable, confounder-adjusted estimates and their precision (eg, 95% confidence interval). Make clear which confounders were adjusted for and why they were included | 9-11  |
| 2  |                          | (b) Report category boundaries when continuous variables were categorized                                        |                                                                                                                                                                                                              |       |
| 3  |                          | (c) If relevant, consider translating estimates of relative risk into absolute risk for a meaningful time period |                                                                                                                                                                                                              |       |
| 4  | Other analyses           | 17                                                                                                               | Report other analyses done—eg analyses of subgroups and interactions, and sensitivity analyses                                                                                                               | 9     |
| 5  | <b>Discussion</b>        |                                                                                                                  |                                                                                                                                                                                                              |       |
| 6  | Key results              | 18                                                                                                               | Summarise key results with reference to study objectives                                                                                                                                                     | 11-12 |
| 7  | Limitations              | 19                                                                                                               | Discuss limitations of the study, taking into account sources of potential bias or imprecision. Discuss both direction and magnitude of any potential bias                                                   | 13-14 |
| 8  | Interpretation           | 20                                                                                                               | Give a cautious overall interpretation of results considering objectives, limitations, multiplicity of analyses, results from similar studies, and other relevant evidence                                   | 11-13 |
| 9  | Generalisability         | 21                                                                                                               | Discuss the generalisability (external validity) of the study results                                                                                                                                        | 13    |
| 10 | <b>Other information</b> |                                                                                                                  |                                                                                                                                                                                                              |       |
| 11 | Funding                  | 22                                                                                                               | Give the source of funding and the role of the funders for the present study and, if applicable, for the original study on which the present article is based                                                | 17    |

\*Give information separately for exposed and unexposed groups.

**Note:** An Explanation and Elaboration article discusses each checklist item and gives methodological background and published examples of transparent reporting. The STROBE checklist is best used in conjunction with this article (freely available on the Web sites of PLoS Medicine at <http://www.plosmedicine.org/>, Annals of Internal Medicine at <http://www.annals.org/>, and Epidemiology at <http://www.epidem.com/>). Information on the STROBE Initiative is available at <http://www.strobe-statement.org>.

# BMJ Open

## Midlife socioeconomic position and old-age dementia mortality: a large prospective register-based study from Finland

|                                 |                                                                                                                                                                                                                                                                      |
|---------------------------------|----------------------------------------------------------------------------------------------------------------------------------------------------------------------------------------------------------------------------------------------------------------------|
| Journal:                        | <i>BMJ Open</i>                                                                                                                                                                                                                                                      |
| Manuscript ID                   | bmjopen-2019-033234.R1                                                                                                                                                                                                                                               |
| Article Type:                   | Original research                                                                                                                                                                                                                                                    |
| Date Submitted by the Author:   | 27-Sep-2019                                                                                                                                                                                                                                                          |
| Complete List of Authors:       | Korhonen, Kaarina; University of Helsinki, Population Research Unit<br>Einiö, Elina; University of Helsinki<br>Leinonen, Taina; Finnish Institute of Occupational Health,<br>Tarkiainen, Lasse; University of Helsinki<br>Martikainen, Pekka; University of Helsinki |
| <b>Primary Subject Heading</b>: | Neurology                                                                                                                                                                                                                                                            |
| Secondary Subject Heading:      | Public health, Sociology                                                                                                                                                                                                                                             |
| Keywords:                       | Dementia < NEUROLOGY, Socioeconomic factors, Alzheimer's disease, Register study                                                                                                                                                                                     |
|                                 |                                                                                                                                                                                                                                                                      |

SCHOLARONE™  
Manuscripts

1  
2  
3  
4 **Midlife socioeconomic position and old-age dementia mortality: a large prospective**  
5  
6 **register-based study from Finland**  
7  
8  
9  
10  
11

12 Kaarina Korhonen<sup>1</sup>, Elina Einiö<sup>1,2,3</sup>, Taina Leinonen<sup>4</sup>, Lasse Tarkiainen<sup>1</sup>, Pekka Martikainen<sup>1,3,5</sup>  
13  
14

15 <sup>1</sup> Population Research Unit, Faculty of Social Sciences, University of Helsinki, Helsinki, Finland  
16

17 <sup>2</sup> Department of Social Policy, London School of Economics and Political Science, London, United Kingdom  
18

19 <sup>3</sup> Max Planck Institute for Demographic Research, Rostock, Germany  
20

21 <sup>4</sup> Finnish Institute of Occupational Health, Helsinki, Finland  
22

23 <sup>5</sup> Department of Public Health Sciences, Stockholm University, Stockholm, Sweden  
24

25 Correspondence to:  
26

27 Kaarina Korhonen  
28

29 Faculty of Social Sciences  
30

31 P.O. Box 18, 00014 University of Helsinki, Finland  
32

33 +358 50 3199 388  
34

35 kaarina.korhonen@helsinki.fi  
36

37 Word count: 4033  
38  
39  
40  
41  
42  
43  
44  
45  
46  
47  
48  
49  
50  
51  
52  
53  
54  
55  
56  
57  
58  
59  
60

## Abstract

**Objectives** To assess the association between multiple indicators of socioeconomic position and dementia-related death, and to estimate the contribution of dementia to socioeconomic differences in overall mortality at older ages.

**Design** Prospective population-based register study.

**Setting** Finland.

**Participants** 11% random sample of the population aged 70–87 resident in Finland at the end of year 2000 (N=54 964).

**Main outcome measure** Incidence rates, Kaplan-Meier survival probabilities and Cox regression hazard ratios of dementia mortality in 2001–2016 by midlife education, occupational social class and household income measured at ages 53–57 years.

**Results** During the 528 387 person-years at risk, 11 395 individuals died from dementia (215.7 per 10 000 person-years). Lower midlife education, occupational social class and household income were associated with higher dementia mortality, and the differences persisted to the oldest old ages. Compared to mortality from all other causes, however, the socioeconomic differences emerged later. Dementia accounted for 28% of the difference between low and high education groups in overall mortality at age 70+, and for 21% of the difference between lowest and highest household income quintiles. All indicators of socioeconomic position were independently associated with dementia mortality, low household income being the strongest independent predictor (HR=1.24, 95% confidence interval 1.16–1.32), followed by basic education (HR=1.14, 1.06–1.23). Manual occupational social class was related to a 6% higher hazard (HR=1.06, 1.01–1.11) compared to non-manual social class. Adjustment for midlife economic activity, baseline marital status and chronic health conditions attenuated the excess hazard of low midlife household income, although significant effects remained.

1  
2  
3 **Conclusion** Several indicators of socioeconomic position predict dementia mortality independently and  
4 socioeconomic inequalities persist into the oldest old ages. The results demonstrate that dementia is among  
5 the most important contributors to socioeconomic inequalities in overall mortality at older ages.  
6  
7  
8

9  
10 **Strengths and limitations of this study**  
11

- 12  
13  
14 • We used longitudinal registry data that permits a 15-year follow-up of dementia mortality with no  
15 attrition or recall bias.  
16  
17  
18 • Dementia is documented in the national death register with high specificity.  
19  
20  
21 • Due to the use of register data, traditional dementia risk factors such as smoking and physical  
22 activity could not be measured.  
23  
24  
25 • All indicators of socioeconomic position were measured in midlife in order to avoid selection to  
26 socioeconomic groups on the basis of cognitive decline.  
27  
28  
29  
30 • This is the first study to show the contribution of dementia to the socioeconomic inequalities in  
31 overall mortality at older ages.  
32  
33  
34  
35  
36  
37  
38  
39  
40  
41  
42  
43  
44  
45  
46  
47  
48  
49  
50  
51  
52  
53  
54  
55  
56  
57  
58  
59  
60

## Introduction

Socioeconomic inequality in health and mortality is one of the most consistent findings in the demographic and social epidemiological literature. Lower education, occupational social class and income are strong predictors of all-cause and cause-specific mortality particularly among the working-age population, but inequalities are clear also at older ages.[1–4] Among the ageing population, the key factors affecting morbidity and disability are Alzheimer’s disease and other forms of progressive dementia. Globally, an estimated 47 million people lived with dementia in 2015, and the number is projected to triple by 2050.[5] In England and Wales, dementia has already become the leading cause of death.[6] Despite the growing societal impact, however, no comprehensive understanding exists about the socioeconomic patterns of dementia mortality.

Educational inequalities in dementia mortality have previously been reported in studies following individuals from midlife or younger old ages[7,8] but not among the oldest old.[8,9] In a Norwegian health examination study, an educational pattern was present only among cohorts aged below 70 at baseline but not among those aged 70 and over.[8] Similarly, among a Finnish cohort aged 90 and over, no statistically significant educational gradient in dementia mortality emerged.[9] The lack of educational differentials among the oldest old may relate to selective survival. People with lower education experience higher mortality at younger ages, and those who survive to older ages do so because of their better health. Thus, the population surviving to older ages is more homogeneous in terms of health-related characteristics and, as a result, the socioeconomic differences in mortality are diminished. Another possible explanation for the lack of educational gradient in dementia mortality is the fact that the distribution of education in the oldest cohorts is highly skewed. Given that the majority of people in these cohorts have no more than basic education, other indicators of socioeconomic position (SEP) may be more suitable for identifying high-risk population subgroups.[2,10] Previous studies suggest that among adults in general, overall mortality disparities are greater or have increased to a greater extent in terms of occupational social class[11] and income[12,13] than education. Among the Finnish cohort of nonagenarians,[9] occupational social class



1  
2  
3 was a strong predictor of dementia mortality with a 3-fold hazard of dementia death among the unskilled  
4  
5 manual workers compared to upper non-manuals. Personal income in midlife, however, was not related to  
6  
7 dementia mortality among a cohort of Norwegian men.[14] To our knowledge, no previous study has  
8  
9 assessed inequalities in dementia mortality by household income, a socioeconomic indicator that is more  
10  
11 directly related to material resources available to the individual and that more rigorously captures the living  
12  
13 conditions of the most disadvantaged population subgroups. A low household income may, in addition to  
14  
15 material disadvantage, induce psychosocial stress, increasing the risk of dementia directly or through less  
16  
17 favourable health behaviours. Disentangling the contributions of education, occupational social class and  
18  
19 household income will thus provide important insights into the potential mechanisms how SEP shapes the  
20  
21 risk of dementia death.  
22  
23  
24

25  
26 This study contributes to the existing knowledge by assessing socioeconomic inequalities in dementia  
27  
28 mortality using multiple indicators of SEP, including education, occupational social class and household  
29  
30 income. More specifically, the aims of the study were to 1) investigate the magnitude of socioeconomic  
31  
32 inequalities in dementia mortality in relation to age, and compare the patterns to those in mortality from all  
33  
34 other causes of death, 2) to quantify the contribution of dementia to the socioeconomic inequalities in  
35  
36 overall mortality at older ages, and 3) to assess whether education, occupational social class and household  
37  
38 income are independently related to dementia mortality once the other indicators are taken into account.  
39  
40 This was because different indicators of SEP are correlated but each of them may have independent  
41  
42 associations with dementia mortality. We further estimated models adjusting for other risk factors including  
43  
44 marital status and various chronic health conditions. We used longitudinal registry data on a large  
45  
46 population-based sample, which permits a 15-year follow-up of dementia-related deaths with no attrition  
47  
48 or recall bias. All indicators of SEP were measured in midlife in order to avoid selection to socioeconomic  
49  
50 groups on the basis of cognitive decline.  
51  
52  
53  
54  
55

## 56 **Methods**

### 57 **Sample**

1  
2  
3 We used an 11% random sample of the Finnish population in 1987–2007 drawn from the Statistics Finland  
4 population register, which covers all permanent residents. Statistics Finland linked the sample with  
5 information from various administrative registers including the national Death Register and healthcare  
6 registers using unique personal identification numbers assigned to all permanent residents.  
7  
8  
9

10  
11  
12 In the present study, we included men and women aged 70–87 at the end of year 2000. For these cohorts,  
13 midlife socioeconomic characteristics could be identified using information from the Population Censuses  
14 conducted in 1970, 1975, 1980 and 1985. Individuals with missing census information due to residing  
15 outside of Finland (n=920) and those with missing household income information due to not being part of  
16 the household population in the census year (n=401) were excluded. 7 individuals emigrated during the first  
17 year of follow-up and thus were excluded from the analyses. The analytic sample consisted of 54 964  
18 individuals.  
19  
20  
21  
22  
23  
24  
25  
26  
27

### 28 29 **Mortality data**

30  
31  
32 Dates and causes of death were obtained from the Death Register. Dementia-related deaths were identified  
33 using the International Classification of Diseases 10<sup>th</sup> revision (ICD-10) codes F00–03 and G30 as the  
34 underlying or any of the three contributory causes of death reported on the death certificate. We identified  
35 11 395 persons who died from dementia and 30 637 persons who died from other causes during the follow-  
36 up in 2001–2016.  
37  
38  
39  
40  
41  
42  
43

### 44 **Indicators of socioeconomic position**

45  
46  
47 The information of all indicators of SEP was derived from the quinquennial population censuses of 1970–  
48 1985. A particular census year was chosen on the basis of the study subject's age so that the indicators were  
49 measured at around the age of 55 (range 53–57) for all. Education was indicated as the highest achieved  
50 qualification, categorised as tertiary (generally 13+ years of education; International Standard  
51 Classification of Education ISCED-1997 codes 5–6), secondary (10–12 years, ISCED 3–4), and basic  
52 education/no qualifications (9 years, ISCED 0–2). Occupational social class comprised five groups,  
53  
54  
55  
56  
57  
58  
59  
60

1  
2  
3 classified as non-manual, manual, self-employed farmer, other self-employed, and no occupation/unknown.  
4  
5 Information of occupational social class in the census year was lacking for 10 465 individuals due to non-  
6  
7 employment at that time. For 9942 individuals, the information could nevertheless be obtained from  
8  
9 previous years in which the individuals were employed. Household income indicated the taxable annual  
10  
11 income of all household members, including all income received in money or monetary benefit subject to  
12  
13 tax. The information was obtained from the Finnish Tax Administration and the Social Insurance Institution  
14  
15 of Finland. We adjusted for household composition using the OECD-modified equivalence scale.[15]  
16  
17 Income quintiles were formed based on the household income distribution in the population aged 15 and  
18  
19 over in the census year.  
20  
21  
22  
23

## 24 **Covariates**

25  
26  
27 The analyses incorporated information of economic activity measured from the census year because being  
28  
29 out of the labour market may indicate poor health and affect dementia risk independently but also lead to  
30  
31 reduced household income. Economic activity was classified as being in the labour force, retired and other  
32  
33 inactive. Marital status was measured at baseline (the end of 2000), classified as married, divorced,  
34  
35 widowed and never married. Baseline chronic health conditions included indicators of vascular and lifestyle  
36  
37 risk factors for dementia,[16] and were identified from health registers in the five-year period before the  
38  
39 baseline, covering 1996–2000. We used the diagnostic records of the hospital discharge register and patient  
40  
41 censuses of the National Institute for Health and Welfare, and the records of prescription medicine  
42  
43 purchases and of entitlement to special reimbursement for the medication expenses for certain chronic  
44  
45 diseases maintained by the Social Insurance Institution of Finland. We included indicators for alcohol-  
46  
47 related diseases and accidental poisoning by alcohol, asthma and other chronic obstructive pulmonary  
48  
49 disease (COPD), diabetes, heart disease and stroke (for coding see Supplementary Table 1). To account  
50  
51 for potential regional variance in socioeconomic characteristics and mortality, we included dummies for  
52  
53 region of residence (Western Finland, Helsinki capital region, rest of Southern Finland, Eastern Finland,  
54  
55 and Lapland) and the degree of urbanisation of the municipality of residence, a variable based on the  
56  
57  
58  
59  
60

1  
2  
3 proportion of population living in urban settlements and the population of the largest urban settlement in  
4  
5 the municipality (urban, semi-urban and rural).  
6  
7

## 8 **Statistical analyses**

9

10  
11 We followed the study population for dementia mortality from 1 January 2001 until 31 December 2016.  
12  
13 Individuals were censored on the date of death, the end of the year preceding emigration, or at the end of  
14  
15 2016, whichever came first.  
16

17  
18 For descriptive statistics, we calculated age-adjusted dementia mortality rates per 10 000 person-years at  
19  
20 risk by indicators of SEP and the covariates. In order to assess the magnitude of socioeconomic inequalities  
21  
22 in relation to age, we estimated Kaplan–Meier survival functions by education, occupational social class  
23  
24 and household income. In these analyses, we contrasted the survival functions of the highest and lowest  
25  
26 education groups, non-manual and manual employees and the highest and lowest household income  
27  
28 quintiles. The equality of survival functions was tested using log-rank tests. For the comparison between  
29  
30 dementia mortality and the more general mortality patterns, separate Kaplan-Meier survival functions were  
31  
32 estimated for mortality from all other causes of death. We also estimated hazard ratios and their 95%  
33  
34 confidence intervals for low versus high socioeconomic groups at the age of 70–79, 80–89 and 90 years  
35  
36 and over.  
37  
38  
39  
40  
41

42 To quantify the contribution of dementia to socioeconomic differences in overall mortality at older ages,  
43  
44 we calculated absolute rate differences in mortality between socioeconomic groups (basic vs. tertiary  
45  
46 education, manual vs. non-manual occupational social class, lowest vs. highest household income quintile)  
47  
48 by cause of death. The contribution was determined by the rate difference in dementia mortality as a  
49  
50 percentage of the rate difference in total mortality. Because the level of dementia mortality increases  
51  
52 substantially with age, we also assessed age-specific contributions (at the age of 70–79, 80–89 and 90+).  
53  
54  
55

56 To estimate the independent associations between each indicator of SEP and dementia mortality, we used  
57  
58 Cox regression models. Attained age in years was used as the time scale, and thus all analyses adjusted for  
59  
60

1  
2  
3 the confounding effect of age.[17] We first estimated crude associations between each indicator and  
4 dementia mortality, adjusting for calendar year dummies, gender, region of residence and the degree of  
5 urbanisation (model 1). Model 2 included education, occupational social class and household income as  
6 covariates, thus showing mutually adjusted associations. Midlife economic activity was adjusted for in  
7 model 3. We further adjusted for baseline marital status and chronic health conditions in model 4 to assess  
8 the extent to which these factors attenuated the relative hazard attached to each socioeconomic indicator.  
9

10 We tested for interactions between gender and each socioeconomic indicator using likelihood ratio test.  
11 Interactions were statistically nonsignificant ( $p>0.05$ ), and thus we conducted all analyses for men and  
12 women combined. We also tested for interactions of all pairwise combinations of the socioeconomic  
13 indicators, adjusting for the covariates of model 1. These interactions were all statistically nonsignificant  
14 ( $p>0.05$ ). All analyses were performed using Stata 15.1.[18]

### 28 **Patient and public involvement**

29 No patients were involved in setting the research question or the outcome measures, nor were they involved  
30 in developing plans for design or implementation of the study. No patients were asked to advise on  
31 interpretation or writing up of results. There are no plans to disseminate the results of the research to study  
32 participants or the relevant patient community.  
33

### 34 **Results**

35 Table 1 shows the distribution of the study population by indicators of midlife SEP, economic activity and  
36 baseline characteristics. The vast majority of individuals (77.2%) had no higher than basic education, and  
37 manual employees formed the largest occupational social class (43.6%). Higher household income quintiles  
38 were over-represented among the study population due to the higher incomes of the middle aged compared  
39 to the rest of the population and also partly because of greater mortality of the lower income groups between  
40 the time of measurement of midlife income and the baseline. During the 528 387 person-years at risk 11  
41 395 individuals died from dementia, the average age-adjusted dementia mortality rate being 223.1 and  
42  
43  
44  
45  
46  
47  
48  
49  
50  
51  
52  
53  
54  
55  
56  
57  
58  
59  
60

1  
2  
3 210.8 per 10 000 person-years among men and women, respectively. The rate was higher for those with  
4  
5 lower education, occupational social class and household income, and also for the non-married and people  
6  
7 with chronic health conditions apart from asthma and other COPD.  
8  
9

10 Kaplan–Meier survival functions in Figure 1 show that dementia mortality differed by all indicators of SEP  
11  
12 (log rank test,  $p < 0.001$  for each indicator), and that the age patterns differed between the indicators (for  
13  
14 95% confidence intervals see Supplementary Table 2). The inequalities emerged at an earlier age when  
15  
16 SEP was measured in terms of household income (Panel c) compared to education (Panel a) and  
17  
18 occupational social class (Panel b). At the age of 90 years and above, by contrast, the differences were more  
19  
20 pronounced when SEP was measured in terms of education. Nevertheless, inequalities in dementia  
21  
22 mortality emerged substantially later in life compared to mortality from all other causes. Hazard ratios in  
23  
24 Table 2 show that relative inequalities in mortality tended to diminish with age for all indicators of SEP  
25  
26 regardless of cause of death. However, education differences in dementia mortality showed a different age  
27  
28 pattern in that the point estimates indicated stable inequality with age.  
29  
30  
31  
32  
33

34 Overall, dementia contributed to 28.1% of educational and 20.9% of household income differences in total  
35  
36 mortality at the age of 70 and over (Table 2). The contribution to occupational social class differences was  
37  
38 somewhat smaller (16.7%). The contribution of dementia to socioeconomic inequalities substantially  
39  
40 increased from the age of 70–79 to 90 years and over.  
41  
42  
43

44 Cox regression models in Table 3 show adjusted hazard ratios (HR) for dementia mortality across all ages  
45  
46 from 70 years and over. Adjusted for calendar year, gender, region of residence and the degree of  
47  
48 urbanisation in model 1, the associations were strongest for basic education (HR=1.23, 95% CI 1.15–1.32),  
49  
50 unknown occupational social class (HR=1.20, 1.00–1.44), and the lowest household income quintile  
51  
52 (HR=1.28, 1.20–1.35). Mutual adjustment of socioeconomic indicators in model 2 attenuated educational  
53  
54 differences by about 40%, and unknown occupational social class to a non-significant level. Basic education  
55  
56 (HR=1.14, 1.06–1.23), manual occupational social class (HR=1.06, 1.01–1.11) and three lowest household  
57  
58  
59  
60

1  
2  
3 income quintiles (for the lowest quintile HR=1.24, 1.16–1.32) all predicted dementia mortality  
4 independently of each other. Adjustment for midlife economic activity in model 3 attenuated the excess  
5 hazard particularly of the lower household income quintiles. Adjustment for baseline marital status and  
6 chronic health conditions in model 4 contributed to a small change in the estimates, the attenuation being  
7 largest for the lowest household income quintile. In this full model, basic education increased the hazard of  
8 dementia death by 14% (1.05–1.22), manual occupational social class by 5% (1.00–1.11) and the two lowest  
9 household income quintiles by 7–13% (HR=1.07, 1.00–1.14 to HR=1.13, 1.06–1.21).

## 20 Discussion

### 23 Main findings and their interpretation

25 In this study we have shown that dementia mortality at older ages is socioeconomically patterned in terms  
26 of multiple indicators of SEP. People with lower education, occupational social class and household income  
27 have a higher risk of dementia death compared to those with higher SEP. These results add to the literature  
28 on socioeconomic inequalities in old-age mortality, which has previously shown a socioeconomic pattern  
29 in many other specific causes of death such as cardiovascular diseases, COPD and cancer.[1] Our results  
30 indicate, moreover, that dementia is an important factor in overall socioeconomic inequalities in old-age  
31 mortality, contributing to 21–28% of household income and educational differences in total mortality  
32 among the population aged 70 and over. The contribution of dementia to overall socioeconomic inequalities  
33 in mortality increased substantially with age, which relates to the increasing proportion of deaths  
34 attributable to dementia with advancing age.[19]

37 A major difference in the patterns between dementia mortality and mortality from all other causes of death  
38 was that socioeconomic inequalities in dementia mortality emerged later and the inequalities in dementia  
39 mortality between high and low education groups persisted in the same magnitude to the oldest old ages  
40 (90 years and above). By contrast, inequalities in mortality from other causes of death tended to diminish  
41 with age. The attenuation of socioeconomic inequalities with age is a general finding,[1,2] and may partly  
42  
43  
44  
45  
46  
47  
48  
49  
50  
51  
52  
53  
54  
55  
56  
57  
58  
59  
60

1  
2  
3 relate to selective survival, suggesting that people who survive to very old age have more similar health  
4 profiles across socioeconomic groups. Our results show, however, that even among people who survive to  
5 the oldest old age, education groups differ in neurological health. This is a novel finding in that previous  
6 studies have identified consistent socioeconomic inequalities in dementia mortality only among the younger  
7 old[7,8] but the results have been mixed for the oldest old.[8,9] Participation bias may at least partly explain  
8 the differences in findings; people of older age, lower SEP and with health problems are less likely to  
9 participate in surveys and studies involving health examinations. Our study employed register data on a  
10 population-based cohort and thus is not affected by participation or attrition biases.

11  
12 The age patterns in dementia mortality differed between indicators of SEP: while educational differences  
13 were more pronounced among the oldest old (90 years and over), the differences among the younger old  
14 (70–79 years) were largest when SEP was measured in terms of household income. The lowest midlife  
15 household income quintiles represent the most disadvantaged population groups with potentially multiple  
16 dementia risk factors. Impoverished material conditions may affect dementia risk through, for example,  
17 psychological stress[20] and health-related behaviours and cardiovascular risk factors.[16] Our findings  
18 show that the higher dementia mortality of the lowest household income quintiles was strongly – although  
19 not fully – related to greater morbidity and early retirement of these groups. It is also possible that severe  
20 health problems that were present already in midlife affected labour market participation and household  
21 incomes and thus confounded the association between income and the risk of dementia death. Future studies  
22 are needed to establish the causal relationship between these factors using formal mediation analysis  
23 techniques.

24  
25 Education, in turn, may have particular benefits above and beyond physical health factors among the  
26 population surviving to the oldest old age. Our results show persistent educational differences in dementia  
27 mortality, and the association was not related to chronic health conditions or marital status at baseline.  
28 Education is a well-established predictor of dementia incidence,[21] although the exact mechanisms are still  
29 not known. Brain autopsy studies indicate, in line with the cognitive reserve hypothesis,[22] that education



1  
2  
3 is not associated with the burden of neuropathology at death but higher education enables individuals to  
4  
5 compensate longer for the neuropathological changes before developing clinical symptoms of dementia.[23]  
6  
7 Thus, it is possible that the educational differences in dementia mortality we found in our study are due to  
8  
9 competing risks; people with higher education died from other causes before they reached the phase of  
10  
11 clinical dementia or died from other causes before dementia progressed to death. However, the empirical  
12  
13 evidence for the cognitive reserve hypothesis remains open to debate. For example, several studies have  
14  
15 not identified educational differences in survival time after dementia onset,[24] which is among the key  
16  
17 hypotheses in the cognitive reserve model.[25] Therefore, it is plausible that higher education enhances  
18  
19 brain health and protects against (or postpones) not only the clinical symptoms but also the development of  
20  
21 neurodegenerative disorders.  
22  
23  
24  
25

26  
27 Occupational social class differences in dementia mortality were modest following adjustment for  
28  
29 education and household income. In particular, the high hazard among those with no occupation  
30  
31 disappeared after these adjustments indicating that this group experienced multiple socioeconomic  
32  
33 disadvantages. The results suggest, nevertheless, that higher social class occupations may involve greater  
34  
35 cognitive demands and intellectual engagement, and thus enhance cognitive health.[26,27] In contrast,  
36  
37 lower class occupations or long periods of economic inactivity due to unemployment or early retirement  
38  
39 may reduce opportunities for cognitive investment. Overall, the results of this study suggest that all three  
40  
41 indicators of SEP are important factors in bringing about socioeconomic differences in dementia mortality,  
42  
43 also influencing inequalities in overall mortality among the older population.  
44  
45  
46  
47

48 We used a unique population-representative sample of older adults in Finland with 11 395 dementia deaths  
49  
50 identified from the National Death Register. The register-based sample was not affected by participation or  
51  
52 attrition bias, which are common limitations of many cohort designs, particularly among the older  
53  
54 population. The population register encompasses rich information on demographic and socioeconomic  
55  
56 characteristics of individuals over the life course, and is not subject to bias from individuals' self-reports  
57  
58 or recollection.  
59  
60

1  
2  
3 Despite the rich register data, our study also has some limitations. First, we could only identify dementia  
4 cases that have been recorded on the death certificate. According to a validation study for identifying  
5 dementia in the Finnish national registers, the documentation of dementia as the cause of death has  
6 improved since the late 1990s, and the specificity is particularly high.[28] To minimise any bias arising  
7 from potential underreporting of dementia as the underlying cause of death, we applied the multiple-cause  
8 approach and included also cases where dementia was recorded as any of the three contributory causes.[29]  
9 Defined this way, we identified 21% of all deaths at the age of 70 and over to be attributable to dementia.  
10 This relatively high proportion is in line with that reported in England and Wales, where dementia  
11 accounted for 19% of all deaths at the age of 80 and over.[30] Furthermore, we ran sensitivity analyses with  
12 interaction with calendar year, and found that the associations between the indicators of SEP and dementia  
13 mortality did not vary in time. Therefore, we believe our results are not biased by overreporting or  
14 underreporting of dementia as the cause of death or by changes in documentation practices. Second, register  
15 data does not cover information of traditional risk factors related to health behaviours such as smoking and  
16 physical activity. However, we included indicators of chronic conditions to measure vascular and life style  
17 risk factors for dementia.  
18  
19 Third, the information of household income was based on taxable income and the variable thus excludes  
20 certain monetary transfers such as housing allowance and social assistance. These means-tested sources of  
21 income may be especially relevant for people with health problems and those outside the labour market.  
22 This might lead to overestimation of the income effect. Information of disposable income was not available  
23 for years 1970–1985, but we carried out a robustness check for the correlation between taxable and  
24 disposable household incomes (as continuous variables) using the population aged 15 and over in 1995 and  
25 found the correlation to be as high as 0.97. Therefore, it is unlikely that the use of disposable income would  
26 change the ranking of individuals in the household income distribution to the extent that it would affect our  
27 main findings.  
28  
29  
30  
31  
32  
33  
34  
35  
36  
37  
38  
39  
40  
41  
42  
43  
44  
45  
46  
47  
48  
49  
50  
51  
52  
53  
54  
55  
56  
57  
58  
59  
60

1  
2  
3 Finally, the causal relationship between SEP and dementia is difficult to establish in observational studies.  
4  
5 We therefore measured all socioeconomic characteristics 15–30 years before the mortality follow-up, and  
6  
7 it is thus very unlikely that any symptoms of dementia affected the midlife socioeconomic attainment of  
8  
9 individuals. Nevertheless, we cannot exclude the possibility that early cognitive decline may have affected  
10  
11 midlife SEP, especially measured in term of occupational social class and household income. Also, given  
12  
13 the small proportion of people with tertiary education in these cohorts (10%), it is possible that this forms  
14  
15 a select group with multiple advantages including higher childhood SEP and early cognitive ability.  
16  
17  
18

## 19 **Conclusions**

20  
21  
22 This study provides new insight into the socioeconomic inequalities in old-age mortality by showing a  
23  
24 consistent pattern in dementia mortality by multiple indicators of SEP. Low education, occupational social  
25  
26 class and household income were all associated with higher risk of dementia death, although the  
27  
28 socioeconomic differences emerged later than in mortality from other causes. Household income  
29  
30 differences in dementia mortality were more pronounced among the younger old, and the associations were  
31  
32 largely attributable to other chronic health conditions such as diabetes and stroke. Educational inequalities,  
33  
34 by contrast, were independent of chronic health conditions and became more pronounced at the oldest old  
35  
36 age where mortality inequalities generally begin to attenuate. The results indicate that dementia mortality  
37  
38 may be amenable to socioeconomic interventions in midlife. The findings also suggest that dementia  
39  
40 contributes to socioeconomic inequalities in overall mortality at older ages and, thus, dementia prevention  
41  
42 is important from the point of view of socioeconomic inequalities in total mortality.  
43  
44  
45  
46  
47  
48  
49  
50  
51  
52  
53  
54  
55  
56  
57  
58  
59  
60

## REFERENCES

- 1 Huisman M, Kunst AE, Bopp M, *et al*. Educational inequalities in cause-specific mortality in middle-aged and older men and women in eight western European populations. *The Lancet* 2005;**365**:493–500.
- 2 Huisman M, Read S, Towriss CA, *et al*. Socioeconomic Inequalities in Mortality Rates in Old Age in the World Health Organization Europe Region. *Epidemiol Rev* 2013;**35**:84–97.
- 3 Marmot MG, Shipley MJ. Do socioeconomic differences in mortality persist after retirement? 25 Year follow up of civil servants from the first Whitehall study. *BMJ* 1996;**313**:1177–80.
- 4 Demakakos P, Biddulph JP, Bobak M, *et al*. Wealth and mortality at older ages: a prospective cohort study. *J Epidemiol Community Health* 2016;**70**:346–353.
- 5 Prince M, Wimo A, Guerchet M, *et al*. World Alzheimer Report 2015—The Global Impact of Dementia: an analysis of prevalence, incidence, cost and trends. 2015. Available: <https://www.alz.co.uk/research/WorldAlzheimerReport2015.pdf> (accessed 13 Sep 2017).
- 6 Office for National Statistics. Deaths registered in England and Wales (series DR): 2016. 2017. Available: <https://www.ons.gov.uk/peoplepopulationandcommunity/birthsdeathsandmarriages/deaths/bulletins/deathsregisteredinenglandandwalesseriesdr/2016#dementia-and-alzheimer-disease-remained-the-leading-cause-of-death-in-2016> (accessed 20 Sep 2019).
- 7 Russ TC, Stamatakis E, Hamer M, *et al*. Socioeconomic status as a risk factor for dementia death: individual participant meta-analysis of 86 508 men and women from the UK. *The British journal of psychiatry* 2013;**203**:10–17.
- 8 Strand BH, Langballe EM, Rosness TA, *et al*. Age, education and dementia related deaths. The Norwegian Counties Study and the Cohort of Norway. *Journal of the neurological sciences* 2014;**345**:75–82.
- 9 Enroth L, Raitanen J, Hervonen A, *et al*. Is socioeconomic status a predictor of mortality in nonagenarians? The vitality 90+ study. *Age and ageing* 2014;**44**:123–129.
- 10 Martelin T. Mortality by indicators of socioeconomic status among the Finnish elderly. *Social science & medicine* 1994;**38**:1257–1278.
- 11 Martikainen P, Blomgren J, Valkonen T. Change in the total and independent effects of education and occupational social class on mortality: analyses of all Finnish men and women in the period 1971–2000. *Journal of Epidemiology & Community Health* 2007;**61**:499–505.
- 12 Rognerud MA, Zahl P-H. Social inequalities in mortality: changes in the relative importance of income, education and household size over a 27-year period. *The European Journal of Public Health* 2005;**16**:62–68.
- 13 Geyer S, Hemström Ö, Peter R, *et al*. Education, income, and occupational class cannot be used interchangeably in social epidemiology. Empirical evidence against a common practice. *Journal of Epidemiology & Community Health* 2006;**60**:804–810.
- 14 Strand BH, Skirbekk V, Rosness TA, *et al*. Income in midlife and dementia related mortality over three decades: A Norwegian prospective study. *eNeurologicalSci* 2015;**1**:24–29.

- 15 OECD. *OECD Framework for Statistics on the Distribution of Household Income, Consumption and Wealth*. Paris: OECD Publishing 2013. Available: <http://dx.doi.org/10.1787/9789264194830-en> (accessed 3 May 2018).
- 16 Baumgart M, Snyder HM, Carrillo MC, *et al*. Summary of the evidence on modifiable risk factors for cognitive decline and dementia: a population-based perspective. *Alzheimer's & dementia: the journal of the Alzheimer's Association* 2015;**11**:718–726.
- 17 Lamarca R, Alonso J, Gómez G, *et al*. Left-truncated data with age as time scale: an alternative for survival analysis in the elderly population. *The Journals of Gerontology Series A: Biological Sciences and Medical Sciences* 1998;**53**:M337–M343.
- 18 StataCorp. *Stata Statistical Software: Release 15*. College Station, TX: StataCorp LLC. 2017.
- 19 Knapp M, Prince M, Albanese E, *et al*. *Dementia UK: The full report*. London: Alzheimer's Society 2007.
- 20 Johansson L, Guo X, Waern M, *et al*. Midlife psychological stress and risk of dementia: a 35-year longitudinal population study. *Brain* 2010;**133**:2217–2224.
- 21 Livingston G, Sommerlad A, Orgeta V, *et al*. Dementia prevention, intervention, and care. *The Lancet* Published Online First: 2017. Available: <https://tbhtoolkits.com/media/Dementia-Prevention-Intervention-and-Care-Lancet-2017-1.pdf> (accessed 11 Sep 2017).
- 22 Stern Y. What is cognitive reserve? Theory and research application of the reserve concept. *Journal of the International Neuropsychological Society* 2002;**8**:448–460.
- 23 Brayne C, Ince PG, Keage HA, *et al*. Education, the brain and dementia: neuroprotection or compensation? EClipSE Collaborative Members. *Brain* 2010;**133**:2210–2216.
- 24 Paradise M, Cooper C, Livingston G. Systematic review of the effect of education on survival in Alzheimer's disease. *International psychogeriatrics* 2009;**21**:25–32.
- 25 Stern Y, Tang MX, Denaro J, *et al*. Increased risk of mortality in Alzheimer's disease patients with more advanced educational and occupational attainment. *Annals of Neurology: Official Journal of the American Neurological Association and the Child Neurology Society* 1995;**37**:590–595.
- 26 Kröger E, Andel R, Lindsay J, *et al*. Is complexity of work associated with risk of dementia? The Canadian Study of Health and Aging. *American journal of epidemiology* 2008;**167**:820–830.
- 27 Karp A, Andel R, Parker MG, *et al*. Mentally stimulating activities at work during midlife and dementia risk after age 75: follow-up study from the Kungsholmen Project. *The American Journal of Geriatric Psychiatry* 2009;**17**:227–236.
- 28 Solomon A, Ngandu T, Soininen H, *et al*. Validity of dementia and Alzheimer's disease diagnoses in Finnish national registers. *Alzheimer's & Dementia* 2014;**10**:303–309. doi:10.1016/j.jalz.2013.03.004
- 29 Garcia-Ptacek S, Kåreholt I, Cermakova P, *et al*. Causes of Death According to Death Certificates in Individuals with Dementia: A Cohort from the Swedish Dementia Registry. *Journal of the American Geriatrics Society* 2016;**64**. doi:10.1111/jgs.14421

- 1  
2  
3 30 Office for National Statistics. Deaths registered in England and Wales, 2016 (dataset). 2017.  
4 Available: <https://www.ons.gov.uk/file?uri=/peoplepopulationandcommunity/birthsdeathsandmarriage>  
5 [s/deaths/datasets/deathsregisteredinenglandandwalesseriesdrreferencetables/2016/drtables16.xls](https://www.ons.gov.uk/file?uri=/peoplepopulationandcommunity/birthsdeathsandmarriage/s/deaths/datasets/deathsregisteredinenglandandwalesseriesdrreferencetables/2016/drtables16.xls)  
6 (accessed 20 Sep 2019).  
7  
8  
9  
10  
11  
12  
13  
14  
15  
16  
17  
18  
19  
20  
21  
22  
23  
24  
25  
26  
27  
28  
29  
30  
31  
32  
33  
34  
35  
36  
37  
38  
39  
40  
41  
42  
43  
44  
45  
46  
47  
48  
49  
50  
51  
52  
53  
54  
55  
56  
57  
58  
59  
60

For peer review only

## Footnotes

**Contributors:** KK, EE, TL, LT and PM participated in designing the study, generating hypotheses, interpreting the data and critically revised the manuscript for important intellectual content. KK analysed the data, conducted the literature review and wrote the first draft of the manuscript.

**Funding:** KK was supported by the Eino Jutikkala Fund. PM was supported by the Academy of Finland, and the Strategic Research Council PROMEQ project (#303615). PM was also supported by the European Union Horizon2020 Programme under grant agreement n° 667661 (Promoting mental wellbeing in the ageing population - MINDMAP). The study does not necessarily reflect the Commission's views and in no way anticipates the Commission's future policy in this area. The funders had no role in study design, data collection and analysis, decision to publish, or preparation of the manuscript.

**Competing interests:** None declared.

**Data sharing statement:** Statistics Finland, the National Institute for Health and Welfare and the Social Insurance Institution of Finland have collected and own the data. Due to data protection regulations, the authors are not allowed to make the data available to third parties. Researchers can apply for data access by contacting the register-holding institutions: Statistics Finland ([http://stat.fi/index\\_en.html](http://stat.fi/index_en.html)); National Institute for Health and Welfare (<https://thl.fi/en>); Social Insurance Institution of Finland (<https://www.kela.fi/web/en>).

**Ethics approval:** The study has been approved by Statistics Finland Board of Ethics (permit TK-53-339-13). The data were collected for routine administrative registration purposes and, therefore, informed consent of the participants was not obtained. These register data can be used for scientific purposes under the Personal Data Act and the Statistics Act. Statistics Finland anonymised the data prior to providing them to researchers.

**Table 1.** Distribution of the study population, dementia deaths and age-adjusted dementia mortality rates (per 10 000 person-years) by indicators of midlife socioeconomic position and economic activity and baseline characteristics, Finnish men and women in 2001–2016

|                                        | N             | %    | Dementia deaths |       |             |
|----------------------------------------|---------------|------|-----------------|-------|-------------|
|                                        |               |      | n               | Rate  | 95% CI      |
| Mean age at baseline (SD)              | 76.4<br>(4.8) |      |                 |       |             |
| Gender                                 |               |      |                 |       |             |
| Men                                    | 20100         | 36.6 | 3409            | 223.1 | 215.6–230.5 |
| Women                                  | 34864         | 63.4 | 7986            | 210.8 | 206.3–215.4 |
| Education <sup>a</sup>                 |               |      |                 |       |             |
| Tertiary                               | 5445          | 9.9  | 1014            | 185.5 | 174.3–196.7 |
| Secondary                              | 7074          | 12.9 | 1446            | 205.7 | 195.4–216.1 |
| Basic                                  | 42445         | 77.2 | 8936            | 221.8 | 217.3–226.3 |
| Occupational social class <sup>a</sup> |               |      |                 |       |             |
| Non-manual                             | 17015         | 31.0 | 3524            | 201.1 | 194.6–207.6 |
| Manual                                 | 23951         | 43.6 | 4882            | 228.4 | 222.1–234.6 |
| Self-employed farmer                   | 10204         | 18.6 | 2211            | 215.7 | 206.9–224.6 |
| Other self-employed                    | 3271          | 6.0  | 657             | 212.2 | 196.3–228.1 |
| No occupation/unknown                  | 523           | 1.0  | 121             | 239.2 | 196.5–282.0 |
| Household income <sup>a</sup>          |               |      |                 |       |             |
| Highest quintile                       | 13667         | 24.9 | 2715            | 196.9 | 189.7–204.2 |
| 2nd                                    | 10522         | 19.1 | 2098            | 209.6 | 200.9–218.4 |
| 3rd                                    | 10110         | 18.4 | 2114            | 217.3 | 208.2–226.3 |
| 4th                                    | 10292         | 18.7 | 2183            | 223.2 | 214.0–232.3 |
| Lowest quintile                        | 10373         | 18.9 | 2285            | 241.5 | 231.8–251.2 |
| Economic activity <sup>a</sup>         |               |      |                 |       |             |
| Active                                 | 37266         | 67.8 | 7585            | 208.1 | 203.6–212.7 |
| Retired                                | 8881          | 16.2 | 1742            | 257.1 | 245.2–269.0 |
| Other inactive                         | 8817          | 16.0 | 2068            | 212.7 | 203.7–221.8 |
| Marital status                         |               |      |                 |       |             |
| Married                                | 24789         | 45.1 | 4471            | 208.7 | 202.6–214.8 |
| Divorced                               | 4056          | 7.4  | 797             | 237.0 | 220.9–253.2 |
| Widowed                                | 20997         | 38.2 | 5000            | 214.3 | 208.4–220.3 |
| Never married                          | 5122          | 9.3  | 1127            | 240.9 | 227.2–254.7 |
| Chronic health conditions              |               |      |                 |       |             |
| Alcohol-related diseases               | 308           | 0.6  | 68              | 505.3 | 381.2–629.3 |
| Asthma and COPD                        | 4510          | 8.2  | 789             | 232.9 | 216.9–248.9 |
| Diabetes                               | 6714          | 12.2 | 1240            | 275.0 | 259.8–290.2 |



|                          |       |       |       |       |             |
|--------------------------|-------|-------|-------|-------|-------------|
| Heart disease            | 18094 | 32.9  | 3562  | 237.1 | 229.5–244.7 |
| Stroke                   | 3180  | 5.8   | 685   | 330.5 | 306.4–354.6 |
| Region of residence      |       |       |       |       |             |
| Western Finland          | 25078 | 45.6  | 4979  | 204.1 | 198.6–209.7 |
| Helsinki capital region  | 7449  | 13.6  | 1582  | 208.3 | 198.3–218.4 |
| Rest of Southern Finland | 12056 | 21.9  | 2464  | 214.8 | 206.5–223.0 |
| Eastern Finland          | 8458  | 15.4  | 1916  | 250.1 | 239.2–261.0 |
| Lapland                  | 1923  | 3.5   | 454   | 261.5 | 238.1–285.0 |
| Degree of urbanisation   |       |       |       |       |             |
| Urban                    | 29853 | 51.0  | 6401  | 217.2 | 212.0–222.4 |
| Semi-urban               | 9285  | 17.7  | 1831  | 210.6 | 201.2–220.0 |
| Rural                    | 15826 | 31.3  | 3163  | 215.3 | 208.0–222.7 |
| Total                    | 54964 | 100.0 | 11395 | 215.7 | 211.7–219.7 |

Abbreviations: CI, confidence intervals; COPD, chronic obstructive pulmonary diseases

<sup>a</sup> Information from the population censuses of 1970–1985, the study population being aged 53–57 years

**Table 2.** Relative and absolute differences in mortality between high and low socioeconomic groups<sup>a</sup> by cause of death and age, and contribution (%) of dementia and other causes of death to socioeconomic differences in total mortality by age, Finnish men and women in 2001–2016

|                                              | 70–79 years |           |                 |                  | 80–89 years |           |                 |                  | 90+ years |           |                 |                  | All ages 70+     |
|----------------------------------------------|-------------|-----------|-----------------|------------------|-------------|-----------|-----------------|------------------|-----------|-----------|-----------------|------------------|------------------|
|                                              | HR          | 95% CI    | Rate difference | Contribution (%) | HR          | 95% CI    | Rate difference | Contribution (%) | HR        | 95% CI    | Rate difference | Contribution (%) | Contribution (%) |
| <b>Education<sup>b</sup></b>                 |             |           |                 |                  |             |           |                 |                  |           |           |                 |                  |                  |
| Dementia                                     | 1.24        | 0.97–1.58 | 8.7             | 8.3              | 1.19        | 1.09–1.29 | 40.4            | 33.5             | 1.24      | 1.10–1.40 | 157.9           | 51.8             | 28.1             |
| Other causes                                 | 1.38        | 1.26–1.50 | 96.1            | 91.7             | 1.11        | 1.06–1.17 | 83.0            | 68.9             | 1.13      | 1.03–1.24 | 146.9           | 48.2             | 71.8             |
| Total mortality                              | 1.36        | 1.25–1.48 | 104.8           | 100.0            | 1.13        | 1.09–1.18 | 120.4           | 102.4            | 1.17      | 1.09–1.26 | 304.8           | 100.0            | 100.0            |
| <b>Occupational social class<sup>c</sup></b> |             |           |                 |                  |             |           |                 |                  |           |           |                 |                  |                  |
| Dementia                                     | 1.22        | 1.03–1.44 | 7.7             | 6.3              | 1.17        | 1.10–1.23 | 35.3            | 20.3             | 1.09      | 1.00–1.17 | 63.5            | 22.8             | 16.7             |
| Other causes                                 | 1.44        | 1.36–1.53 | 114.2           | 93.8             | 1.24        | 1.20–1.29 | 138.7           | 79.7             | 1.19      | 1.12–1.27 | 215.0           | 77.2             | 83.3             |
| Total mortality                              | 1.41        | 1.34–1.49 | 121.8           | 100.1            | 1.22        | 1.19–1.26 | 173.9           | 100.0            | 1.15      | 1.09–1.21 | 278.4           | 100.0            | 100.0            |
| <b>Household income<sup>d</sup></b>          |             |           |                 |                  |             |           |                 |                  |           |           |                 |                  |                  |
| Dementia                                     | 1.63        | 1.32–2.01 | 22.4            | 12.9             | 1.22        | 1.14–1.31 | 46.3            | 21.4             | 1.19      | 1.08–1.32 | 135.6           | 35.2             | 20.9             |
| Other causes                                 | 1.54        | 1.43–1.66 | 151.0           | 87.1             | 1.24        | 1.19–1.30 | 169.7           | 78.6             | 1.19      | 1.10–1.28 | 249.1           | 64.8             | 79.2             |
| Total mortality                              | 1.55        | 1.44–1.67 | 173.3           | 100.0            | 1.24        | 1.19–1.29 | 216.0           | 100.0            | 1.19      | 1.12–1.26 | 384.7           | 100.0            | 100.0            |

Abbreviations: CI, confidence interval; HR, hazard ratio

Hazard ratios adjusted for calendar year. Age-adjusted incidence rates calculated as dementia deaths per 10,000 person-years at risk. Contribution of dementia determined by the rate difference in dementia mortality as a percentage of the rate difference in total mortality

<sup>a</sup> Information from the population censuses of 1970–1985, the study population being aged 53–57 years

<sup>b</sup> Tertiary vs. basic education

<sup>c</sup> Non-manual vs. manual occupational social class

<sup>d</sup> Highest vs. lowest household income quintiles

**Table 3.** Hazard ratios and 95% confidence intervals for dementia mortality by indicators of midlife socioeconomic position<sup>a</sup>, Finnish men and women in 2001–2016, n=54,964

| Indicator of socioeconomic position | Model 1 <sup>b</sup> |           | Model 2 <sup>c</sup> |           | Model 3 <sup>d</sup> |           | Model 4 <sup>e</sup> |           |
|-------------------------------------|----------------------|-----------|----------------------|-----------|----------------------|-----------|----------------------|-----------|
|                                     | HR                   | 95% CI    | HR                   | 95% CI    | HR                   | 95% CI    | HR                   | 95% CI    |
| Education                           |                      |           |                      |           |                      |           |                      |           |
| Tertiary                            | 1.00                 |           | 1.00                 |           | 1.00                 |           | 1.00                 |           |
| Secondary                           | 1.14                 | 1.05–1.23 | 1.08                 | 0.99–1.17 | 1.08                 | 0.99–1.17 | 1.08                 | 0.99–1.17 |
| Basic                               | 1.23                 | 1.15–1.32 | 1.14                 | 1.06–1.23 | 1.14                 | 1.05–1.22 | 1.14                 | 1.05–1.22 |
| Occupational social class           |                      |           |                      |           |                      |           |                      |           |
| Non-manual                          | 1.00                 |           | 1.00                 |           | 1.00                 |           | 1.00                 |           |
| Manual                              | 1.14                 | 1.09–1.20 | 1.06                 | 1.01–1.11 | 1.05                 | 1.00–1.11 | 1.05                 | 1.00–1.11 |
| Farmer                              | 1.08                 | 1.02–1.15 | 0.96                 | 0.90–1.03 | 0.97                 | 0.91–1.04 | 0.98                 | 0.92–1.05 |
| Other self-employed                 | 1.05                 | 0.96–1.14 | 0.98                 | 0.90–1.07 | 0.99                 | 0.91–1.08 | 1.00                 | 0.92–1.09 |
| No occupation/unknown               | 1.20                 | 1.00–1.44 | 1.04                 | 0.87–1.25 | 0.94                 | 0.78–1.14 | 0.94                 | 0.78–1.14 |
| Household income                    |                      |           |                      |           |                      |           |                      |           |
| Highest quintile                    | 1.00                 |           | 1.00                 |           | 1.00                 |           | 1.00                 |           |
| 2nd                                 | 1.08                 | 1.02–1.14 | 1.04                 | 0.98–1.10 | 1.03                 | 0.98–1.10 | 1.02                 | 0.96–1.09 |
| 3rd                                 | 1.13                 | 1.07–1.20 | 1.08                 | 1.02–1.15 | 1.07                 | 1.00–1.14 | 1.05                 | 0.99–1.12 |
| 4th                                 | 1.17                 | 1.10–1.24 | 1.13                 | 1.06–1.20 | 1.10                 | 1.03–1.17 | 1.07                 | 1.00–1.14 |
| Lowest quintile                     | 1.28                 | 1.20–1.35 | 1.24                 | 1.16–1.32 | 1.18                 | 1.10–1.26 | 1.13                 | 1.06–1.21 |

Abbreviations: CI, confidence interval; HR, hazard ratio

All models used age as time scale and adjusted for calendar year, gender, region of residence and the degree of urbanisation

<sup>a</sup> Information from the population censuses of 1970–1985, the study population being aged 53–57 years

<sup>b</sup> Model 1: each indicator of socioeconomic position separately

<sup>c</sup> Model 2: indicators of socioeconomic position mutually adjusted

<sup>d</sup> Model 3: model 2 + midlife economic activity

<sup>e</sup> Model 4: model 3 + baseline marital status and chronic health conditions (alcohol-related diseases, asthma and chronic obstructive pulmonary disease, diabetes, heart disease and stroke)

1  
2  
3 **Figure 1.** Kaplan–Meier survival probabilities for dementia mortality and mortality from all other causes  
4 of death by a) education, b) occupational social class and c) household income quintile (Q1=highest,  
5 Q5=lowest), Finnish men and women in 2001–2016. Information of midlife socioeconomic position  
6 obtained from the population censuses of 1970–1985, the study population being aged 53–57 years  
7  
8  
9  
10  
11  
12  
13  
14  
15  
16  
17  
18  
19  
20  
21  
22  
23  
24  
25  
26  
27  
28  
29  
30  
31  
32  
33  
34  
35  
36  
37  
38  
39  
40  
41  
42  
43  
44  
45  
46  
47  
48  
49  
50  
51  
52  
53  
54  
55  
56  
57  
58  
59  
60

For peer review only

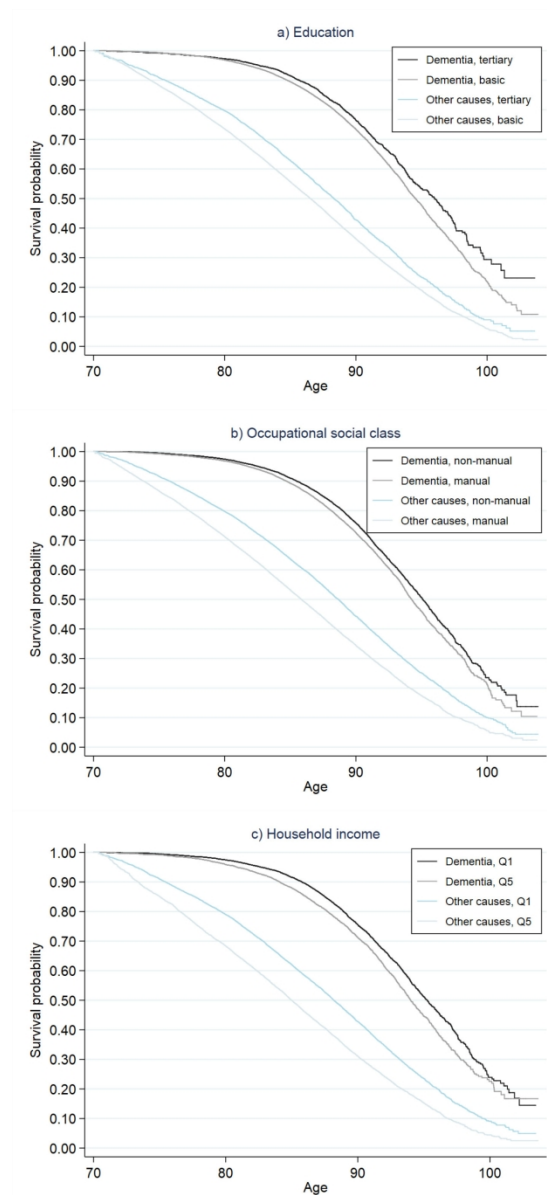

Figure 1. Kaplan–Meier survival probabilities for dementia mortality and mortality from all other causes of death by a) education, b) occupational social class and c) household income quintile (Q1=highest, Q5=lowest), Finnish men and women in 2001–2016. Information of midlife socioeconomic position obtained from the population censuses of 1970–1985, the study population being aged 53–57 years

122x265mm (300 x 300 DPI)

**Supplementary Table 1.** Classification of chronic health conditions used as covariates in the study

| Condition                                                    | Hospital diagnoses (ICD-10)                                               | Prescription medication (ATC) | Special reimbursement category (Finnish disease code) |
|--------------------------------------------------------------|---------------------------------------------------------------------------|-------------------------------|-------------------------------------------------------|
| Alcohol-related diseases and accidental poisoning by alcohol | F10–19, G31.2, G40.51, G62.1, G72.1, I42.6, K29.2, K70, K86.0, O35.4, X45 |                               |                                                       |
| Asthma and other COPD                                        | J43–46                                                                    |                               | 203                                                   |
| Diabetes                                                     | E10–14                                                                    | A10                           | 103                                                   |
| Heart disease                                                | I00–09, I20–52                                                            |                               | 201, 206, 207                                         |
| Stroke                                                       | I60–66, G45                                                               |                               |                                                       |

Abbreviations: ATC, Anatomical Therapeutic Chemical; COPD, chronic obstructive pulmonary diseases; ICD, International Classification of Diseases

view only

**Supplementary Table 2.** Kaplan-Meier survival probabilities at specific ages by midlife a) education, b) occupational social class and c) household income quintile (Q1=highest, Q5=lowest), Finnish men and women in 2001–2016

|                                     | Age | Dementia          |           | Other causes      |           |
|-------------------------------------|-----|-------------------|-----------|-------------------|-----------|
|                                     |     | Survivor function | 95% CI    | Survivor function | 95% CI    |
| <b>a) Education</b>                 |     |                   |           |                   |           |
| Tertiary                            | 70  | 1.00              |           | 1.00              |           |
|                                     | 75  | 0.99              | 0.99–1.00 | 0.91              | 0.89–0.92 |
|                                     | 80  | 0.97              | 0.97–0.98 | 0.80              | 0.78–0.82 |
|                                     | 85  | 0.92              | 0.90–0.92 | 0.63              | 0.61–0.65 |
|                                     | 90  | 0.76              | 0.75–0.78 | 0.43              | 0.41–0.44 |
|                                     | 95  | 0.53              | 0.50–0.56 | 0.23              | 0.22–0.25 |
|                                     | 100 | 0.29              | 0.24–0.35 | 0.09              | 0.07–0.11 |
| Basic                               | 70  | 1.00              |           | 1.00              |           |
|                                     | 75  | 0.99              | 0.99–1.00 | 0.88              | 0.87–0.89 |
|                                     | 80  | 0.97              | 0.97–0.97 | 0.74              | 0.73–0.74 |
|                                     | 85  | 0.89              | 0.89–0.90 | 0.56              | 0.55–0.56 |
|                                     | 90  | 0.73              | 0.73–0.74 | 0.36              | 0.36–0.37 |
|                                     | 95  | 0.48              | 0.47–0.49 | 0.19              | 0.18–0.20 |
|                                     | 100 | 0.22              | 0.20–0.24 | 0.06              | 0.05–0.07 |
| <b>b) Occupational social class</b> |     |                   |           |                   |           |
| Non-manual                          | 70  | 1.00              |           | 1.00              |           |
|                                     | 75  | 1.00              | 0.99–1.00 | 0.92              | 0.90–0.93 |
|                                     | 80  | 0.97              | 0.97–0.98 | 0.80              | 0.79–0.81 |
|                                     | 85  | 0.91              | 0.90–0.92 | 0.64              | 0.63–0.65 |
|                                     | 90  | 0.76              | 0.75–0.77 | 0.44              | 0.43–0.45 |
|                                     | 95  | 0.51              | 0.49–0.52 | 0.25              | 0.24–0.26 |
|                                     | 100 | 0.24              | 0.21–0.27 | 0.10              | 0.09–0.11 |
| Manual                              | 70  | 1.00              |           | 1.00              |           |
|                                     | 75  | 0.99              | 0.99–0.99 | 0.87              | 0.85–0.88 |
|                                     | 80  | 0.97              | 0.96–0.97 | 0.71              | 0.70–0.72 |
|                                     | 85  | 0.89              | 0.89–0.90 | 0.53              | 0.52–0.54 |
|                                     | 90  | 0.73              | 0.72–0.73 | 0.34              | 0.34–0.35 |
|                                     | 95  | 0.46              | 0.45–0.47 | 0.17              | 0.17–0.18 |
|                                     | 100 | 0.21              | 0.18–0.24 | 0.06              | 0.05–0.07 |

|                     | Age | Dementia          |           | Other causes      |           |
|---------------------|-----|-------------------|-----------|-------------------|-----------|
|                     |     | Survivor function | 95% CI    | Survivor function | 95% CI    |
| c) Household income |     |                   |           |                   |           |
| Q1                  | 70  | 1.00              |           | 1.00              |           |
|                     | 75  | 0.99              | 0.99–1.00 | 0.91              | 0.90–0.92 |
|                     | 80  | 0.97              | 0.97–0.98 | 0.79              | 0.78–0.80 |
|                     | 85  | 0.92              | 0.91–0.92 | 0.62              | 0.61–0.63 |
|                     | 90  | 0.75              | 0.74–0.76 | 0.43              | 0.42–0.44 |
|                     | 95  | 0.51              | 0.49–0.53 | 0.24              | 0.22–0.25 |
|                     | 100 | 0.24              | 0.20–0.28 | 0.09              | 0.08–0.11 |
| Q5                  | 70  | 1.00              |           | 1.00              |           |
|                     | 75  | 0.99              | 0.99–1.00 | 0.85              | 0.83–0.87 |
|                     | 80  | 0.96              | 0.95–0.97 | 0.68              | 0.67–0.70 |
|                     | 85  | 0.88              | 0.87–0.89 | 0.50              | 0.48–0.51 |
|                     | 90  | 0.71              | 0.70–0.72 | 0.31              | 0.30–0.32 |
|                     | 95  | 0.45              | 0.43–0.47 | 0.15              | 0.14–0.16 |
|                     | 100 | 0.23              | 0.19–0.26 | 0.04              | 0.04–0.06 |



STROBE Statement—Checklist of items that should be included in reports of *cohort studies*

|                              | Item No | Recommendation                                                                                                                                                                                                                                                                                                         | Page No                    |
|------------------------------|---------|------------------------------------------------------------------------------------------------------------------------------------------------------------------------------------------------------------------------------------------------------------------------------------------------------------------------|----------------------------|
| <b>Title and abstract</b>    | 1       | (a) Indicate the study's design with a commonly used term in the title or the abstract<br>(b) Provide in the abstract an informative and balanced summary of what was done and what was found                                                                                                                          | 1<br>2-3                   |
| <b>Introduction</b>          |         |                                                                                                                                                                                                                                                                                                                        |                            |
| Background/rationale         | 2       | Explain the scientific background and rationale for the investigation being reported                                                                                                                                                                                                                                   | 4                          |
| Objectives                   | 3       | State specific objectives, including any prespecified hypotheses                                                                                                                                                                                                                                                       | 5                          |
| <b>Methods</b>               |         |                                                                                                                                                                                                                                                                                                                        |                            |
| Study design                 | 4       | Present key elements of study design early in the paper                                                                                                                                                                                                                                                                | 5-6                        |
| Setting                      | 5       | Describe the setting, locations, and relevant dates, including periods of recruitment, exposure, follow-up, and data collection                                                                                                                                                                                        | 5-6                        |
| Participants                 | 6       | (a) Give the eligibility criteria, and the sources and methods of selection of participants. Describe methods of follow-up<br>(b) For matched studies, give matching criteria and number of exposed and unexposed                                                                                                      | 5-6                        |
| Variables                    | 7       | Clearly define all outcomes, exposures, predictors, potential confounders, and effect modifiers. Give diagnostic criteria, if applicable                                                                                                                                                                               | 6-7                        |
| Data sources/<br>measurement | 8*      | For each variable of interest, give sources of data and details of methods of assessment (measurement). Describe comparability of assessment methods if there is more than one group                                                                                                                                   | 6-7                        |
| Bias                         | 9       | Describe any efforts to address potential sources of bias                                                                                                                                                                                                                                                              | 8-9                        |
| Study size                   | 10      | Explain how the study size was arrived at                                                                                                                                                                                                                                                                              | 5-6                        |
| Quantitative variables       | 11      | Explain how quantitative variables were handled in the analyses. If applicable, describe which groupings were chosen and why                                                                                                                                                                                           | 6-9                        |
| Statistical methods          | 12      | (a) Describe all statistical methods, including those used to control for confounding<br>(b) Describe any methods used to examine subgroups and interactions<br>(c) Explain how missing data were addressed<br>(d) If applicable, explain how loss to follow-up was addressed<br>(e) Describe any sensitivity analyses | 8-9<br>9<br>5-6<br>8<br>13 |
| <b>Results</b>               |         |                                                                                                                                                                                                                                                                                                                        |                            |
| Participants                 | 13*     | (a) Report numbers of individuals at each stage of study—eg numbers potentially eligible, examined for eligibility, confirmed eligible, included in the study, completing follow-up, and analysed<br>(b) Give reasons for non-participation at each stage<br>(c) Consider use of a flow diagram                        | 9<br>9                     |
| Descriptive data             | 14*     | (a) Give characteristics of study participants (eg demographic, clinical, social) and information on exposures and potential confounders<br>(b) Indicate number of participants with missing data for each variable of interest<br>(c) Summarise follow-up time (eg, average and total amount)                         | 9                          |
| Outcome data                 | 15*     | Report numbers of outcome events or summary measures over time                                                                                                                                                                                                                                                         | 9                          |

|    |                          |                                                                                                                  |                                                                                                                                                                                                              |       |
|----|--------------------------|------------------------------------------------------------------------------------------------------------------|--------------------------------------------------------------------------------------------------------------------------------------------------------------------------------------------------------------|-------|
| 1  | Main results             | 16                                                                                                               | (a) Give unadjusted estimates and, if applicable, confounder-adjusted estimates and their precision (eg, 95% confidence interval). Make clear which confounders were adjusted for and why they were included | 9-11  |
| 2  |                          | (b) Report category boundaries when continuous variables were categorized                                        |                                                                                                                                                                                                              |       |
| 3  |                          | (c) If relevant, consider translating estimates of relative risk into absolute risk for a meaningful time period |                                                                                                                                                                                                              |       |
| 4  | Other analyses           | 17                                                                                                               | Report other analyses done—eg analyses of subgroups and interactions, and sensitivity analyses                                                                                                               | 9     |
| 5  | <b>Discussion</b>        |                                                                                                                  |                                                                                                                                                                                                              |       |
| 6  | Key results              | 18                                                                                                               | Summarise key results with reference to study objectives                                                                                                                                                     | 11-12 |
| 7  | Limitations              | 19                                                                                                               | Discuss limitations of the study, taking into account sources of potential bias or imprecision. Discuss both direction and magnitude of any potential bias                                                   | 13-14 |
| 8  | Interpretation           | 20                                                                                                               | Give a cautious overall interpretation of results considering objectives, limitations, multiplicity of analyses, results from similar studies, and other relevant evidence                                   | 11-13 |
| 9  | Generalisability         | 21                                                                                                               | Discuss the generalisability (external validity) of the study results                                                                                                                                        | 13    |
| 10 | <b>Other information</b> |                                                                                                                  |                                                                                                                                                                                                              |       |
| 11 | Funding                  | 22                                                                                                               | Give the source of funding and the role of the funders for the present study and, if applicable, for the original study on which the present article is based                                                | 17    |

\*Give information separately for exposed and unexposed groups.

**Note:** An Explanation and Elaboration article discusses each checklist item and gives methodological background and published examples of transparent reporting. The STROBE checklist is best used in conjunction with this article (freely available on the Web sites of PLoS Medicine at <http://www.plosmedicine.org/>, Annals of Internal Medicine at <http://www.annals.org/>, and Epidemiology at <http://www.epidem.com/>). Information on the STROBE Initiative is available at <http://www.strobe-statement.org>.

# BMJ Open

## Midlife socioeconomic position and old-age dementia mortality: a large prospective register-based study from Finland

|                                 |                                                                                                                                                                                                                                                                      |
|---------------------------------|----------------------------------------------------------------------------------------------------------------------------------------------------------------------------------------------------------------------------------------------------------------------|
| Journal:                        | <i>BMJ Open</i>                                                                                                                                                                                                                                                      |
| Manuscript ID                   | bmjopen-2019-033234.R2                                                                                                                                                                                                                                               |
| Article Type:                   | Original research                                                                                                                                                                                                                                                    |
| Date Submitted by the Author:   | 13-Nov-2019                                                                                                                                                                                                                                                          |
| Complete List of Authors:       | Korhonen, Kaarina; University of Helsinki, Population Research Unit<br>Einiö, Elina; University of Helsinki<br>Leinonen, Taina; Finnish Institute of Occupational Health,<br>Tarkiainen, Lasse; University of Helsinki<br>Martikainen, Pekka; University of Helsinki |
| <b>Primary Subject Heading</b>: | Neurology                                                                                                                                                                                                                                                            |
| Secondary Subject Heading:      | Public health, Sociology                                                                                                                                                                                                                                             |
| Keywords:                       | Dementia < NEUROLOGY, Socioeconomic factors, Alzheimer's disease, Register study                                                                                                                                                                                     |
|                                 |                                                                                                                                                                                                                                                                      |

SCHOLARONE™  
Manuscripts

1  
2  
3  
4 **Midlife socioeconomic position and old-age dementia mortality: a large prospective**  
5  
6 **register-based study from Finland**  
7  
8  
9  
10  
11

12 Kaarina Korhonen<sup>1</sup>, Elina Einiö<sup>1,2,3</sup>, Taina Leinonen<sup>4</sup>, Lasse Tarkiainen<sup>1</sup>, Pekka Martikainen<sup>1,3,5</sup>  
13  
14

15 <sup>1</sup> Population Research Unit, Faculty of Social Sciences, University of Helsinki, Helsinki, Finland  
16

17 <sup>2</sup> Department of Social Policy, London School of Economics and Political Science, London, United Kingdom  
18

19 <sup>3</sup> Max Planck Institute for Demographic Research, Rostock, Germany  
20

21 <sup>4</sup> Finnish Institute of Occupational Health, Helsinki, Finland  
22

23 <sup>5</sup> Department of Public Health Sciences, Stockholm University, Stockholm, Sweden  
24

25 Correspondence to:  
26

27 Kaarina Korhonen  
28

29 Faculty of Social Sciences  
30

31 P.O. Box 18, 00014 University of Helsinki, Finland  
32

33 +358 50 3199 388  
34

35 kaarina.korhonen@helsinki.fi  
36

37 Word count: 4117  
38  
39  
40  
41  
42  
43  
44  
45  
46  
47  
48  
49  
50  
51  
52  
53  
54  
55  
56  
57  
58  
59  
60

## Abstract

**Objectives** To assess the association between multiple indicators of socioeconomic position and dementia-related death, and to estimate the contribution of dementia to socioeconomic differences in overall mortality at older ages.

**Design** Prospective population-based register study.

**Setting** Finland.

**Participants** 11% random sample of the population aged 70–87 resident in Finland at the end of year 2000 (N=54 964).

**Main outcome measure** Incidence rates, Kaplan-Meier survival probabilities and Cox regression hazard ratios of dementia mortality in 2001–2016 by midlife education, occupational social class and household income measured at ages 53–57 years.

**Results** During the 528 387 person-years at risk, 11 395 individuals died from dementia (215.7 per 10 000 person-years). Lower midlife education, occupational social class and household income were associated with higher dementia mortality, and the differences persisted to the oldest old ages. Compared to mortality from all other causes, however, the socioeconomic differences emerged later. Dementia accounted for 28% of the difference between low and high education groups in overall mortality at age 70+, and for 21% of the difference between lowest and highest household income quintiles. All indicators of socioeconomic position were independently associated with dementia mortality, low household income being the strongest independent predictor (HR=1.24, 95% confidence interval 1.16–1.32), followed by basic education (HR=1.14, 1.06–1.23). Manual occupational social class was related to a 6% higher hazard (HR=1.06, 1.01–1.11) compared to non-manual social class. Adjustment for midlife economic activity, baseline marital status and chronic health conditions attenuated the excess hazard of low midlife household income, although significant effects remained.

1  
2  
3 **Conclusion** Several indicators of socioeconomic position predict dementia mortality independently and  
4 socioeconomic inequalities persist into the oldest old ages. The results demonstrate that dementia is among  
5 the most important contributors to socioeconomic inequalities in overall mortality at older ages.  
6  
7  
8

9  
10 **Strengths and limitations of this study**  
11

- 12  
13  
14 • We used longitudinal registry data that permits a 15-year follow-up of dementia mortality with no  
15 attrition or recall bias.  
16  
17  
18 • Dementia is documented in the national death register with high specificity.  
19  
20  
21 • Due to the use of register data, traditional dementia risk factors such as smoking and physical  
22 activity could not be measured.  
23  
24  
25 • All indicators of socioeconomic position were measured in midlife in order to avoid selection to  
26 socioeconomic groups on the basis of cognitive decline.  
27  
28  
29  
30 • This is the first study to show the contribution of dementia to the socioeconomic inequalities in  
31 overall mortality at older ages.  
32  
33  
34  
35  
36  
37  
38  
39  
40  
41  
42  
43  
44  
45  
46  
47  
48  
49  
50  
51  
52  
53  
54  
55  
56  
57  
58  
59  
60

## Introduction

Socioeconomic inequality in health and mortality is one of the most consistent findings in the demographic and social epidemiological literature. Lower education, occupational social class and income are strong predictors of all-cause and cause-specific mortality particularly among the working-age population, but inequalities are clear also at older ages.[1–4] Among the ageing population, the key factors affecting morbidity and disability are Alzheimer’s disease and other forms of progressive dementia. Globally, an estimated 47 million people lived with dementia in 2015, and the number is projected to triple by 2050.[5] In England and Wales, dementia has already become the leading cause of death.[6] Despite the growing societal impact, however, no comprehensive understanding exists about the socioeconomic patterns of dementia mortality.

Educational inequalities in dementia mortality have previously been reported in studies following individuals from midlife or younger old ages[7,8] but not among the oldest old.[8,9] In a Norwegian health examination study, an educational pattern was present only among cohorts aged below 70 at baseline but not among those aged 70 and over.[8] Similarly, among a Finnish cohort aged 90 and over, no statistically significant educational gradient in dementia mortality emerged.[9] The lack of educational differentials among the oldest old may relate to selective survival. People with lower education experience higher mortality at younger ages, and those who survive to older ages do so because of their better health. Thus, the population surviving to older ages is more homogeneous in terms of health-related characteristics and, as a result, the socioeconomic differences in mortality are diminished. Another possible explanation for the lack of educational gradient in dementia mortality is the fact that the distribution of education in the oldest cohorts is highly skewed. Given that the majority of people in these cohorts have no more than basic education, other indicators of socioeconomic position (SEP) may be more suitable for identifying high-risk population subgroups.[2,10] Previous studies suggest that among adults in general, overall mortality disparities are greater or have increased to a greater extent in terms of occupational social class[11] and income[12,13] than education. Among the Finnish cohort of nonagenarians,[9] occupational social class

1  
2  
3 was a strong predictor of dementia mortality with a 3-fold hazard of dementia death among the unskilled  
4  
5 manual workers compared to upper non-manuals. Personal income in midlife, however, was not related to  
6  
7 dementia mortality among a cohort of Norwegian men.[14] To our knowledge, no previous study has  
8  
9 assessed inequalities in dementia mortality by household income, a socioeconomic indicator that is more  
10  
11 directly related to material resources available to the individual and that more rigorously captures the living  
12  
13 conditions of the most disadvantaged population subgroups. A low household income may, in addition to  
14  
15 material disadvantage, induce psychosocial stress, increasing the risk of dementia directly or through less  
16  
17 favourable health behaviours. Disentangling the contributions of education, occupational social class and  
18  
19 household income will thus provide important insights into the potential mechanisms how SEP shapes the  
20  
21 risk of dementia death.  
22  
23  
24

25  
26 This study contributes to the existing knowledge by assessing socioeconomic inequalities in dementia  
27  
28 mortality using multiple indicators of SEP, including education, occupational social class and household  
29  
30 income. More specifically, the aims of the study were to 1) investigate the magnitude of socioeconomic  
31  
32 inequalities in dementia mortality in relation to age, and compare the patterns to those in mortality from all  
33  
34 other causes of death, 2) to quantify the contribution of dementia to the socioeconomic inequalities in  
35  
36 overall mortality at older ages, and 3) to assess whether education, occupational social class and household  
37  
38 income are independently related to dementia mortality once the other indicators are taken into account.  
39  
40 This was because different indicators of SEP are correlated but each of them may have independent  
41  
42 associations with dementia mortality. We further estimated models adjusting for confounders including  
43  
44 marital status and chronic health conditions. We used longitudinal registry data on a large population-based  
45  
46 sample, which permits a 15-year follow-up of dementia-related deaths with no attrition or recall bias. All  
47  
48 indicators of SEP were measured in midlife in order to avoid selection to socioeconomic groups on the  
49  
50 basis of cognitive decline.  
51  
52  
53  
54  
55

## 56 **Methods**

### 57 **Sample**



1  
2  
3 We used an 11% random sample of the Finnish population in 1987–2007 drawn from the Statistics Finland  
4 population register, which covers all permanent residents. Statistics Finland linked the sample with  
5 information from various administrative registers including the national Death Register and healthcare  
6 registers using unique personal identification numbers assigned to all permanent residents.  
7  
8  
9

10  
11  
12 In the present study, we included men and women aged 70–87 at the end of year 2000. For these cohorts,  
13 midlife socioeconomic characteristics could be identified using information from the Population Censuses  
14 conducted in 1970, 1975, 1980 and 1985. Individuals with missing census information due to residing  
15 outside of Finland (n=920) and those with missing household income information due to not being part of  
16 the household population in the census year (n=401) were excluded. 7 individuals emigrated during the first  
17 year of follow-up and thus were excluded from the analyses. The analytic sample consisted of 54 964  
18 individuals.  
19  
20  
21  
22  
23  
24  
25  
26  
27  
28

### 29 **Mortality data**

30  
31  
32 Dates and causes of death were obtained from the Death Register. Dementia-related deaths were identified  
33 using the International Classification of Diseases 10<sup>th</sup> revision (ICD-10) codes F00–03 and G30 as the  
34 underlying or any of the three contributory causes of death reported on the death certificate. We identified  
35 11 395 persons who died from dementia and 30 637 persons who died from other causes during the follow-  
36 up in 2001–2016.  
37  
38  
39  
40  
41  
42  
43

### 44 **Indicators of socioeconomic position**

45  
46  
47 The information of all indicators of SEP was derived from the quinquennial population censuses of 1970–  
48 1985. A particular census year was chosen on the basis of the study subject's age so that the indicators were  
49 measured at around the age of 55 (range 53–57) for all. Education was indicated as the highest achieved  
50 qualification, categorised as tertiary (generally 13+ years of education; International Standard  
51 Classification of Education ISCED-1997 codes 5–6), secondary (10–12 years, ISCED 3–4), and basic  
52 education/no qualifications (9 years, ISCED 0–2). Occupational social class comprised five groups,  
53  
54  
55  
56  
57  
58  
59  
60

1  
2  
3 classified as non-manual, manual, self-employed farmer, other self-employed, and no occupation/unknown.  
4  
5 Information of occupational social class in the census year was lacking for 10 465 individuals due to non-  
6  
7 employment at that time. For 9942 individuals, the information could nevertheless be obtained from  
8  
9 previous years in which the individuals were employed. Household income indicated the taxable annual  
10  
11 income of all household members, including all income received in money or monetary benefit subject to  
12  
13 tax. The information was obtained from the Finnish Tax Administration and the Social Insurance Institution  
14  
15 of Finland. We adjusted for household composition using the OECD-modified equivalence scale.[15]  
16  
17 Income quintiles were formed based on the household income distribution in the population aged 15 and  
18  
19 over in the census year.  
20  
21  
22  
23

## 24 **Covariates**

25  
26  
27 The analyses incorporated information of economic activity measured from the census year because being  
28  
29 out of the labour market may indicate poor health and affect dementia risk independently but also lead to  
30  
31 reduced household income. Economic activity was classified as being in the labour force, retired and other  
32  
33 inactive. Marital status was measured at baseline (the end of 2000), classified as married, divorced,  
34  
35 widowed and never married. Baseline chronic health conditions included indicators of vascular and lifestyle  
36  
37 risk factors for dementia,[16] and were identified from health registers in the five-year period before the  
38  
39 baseline, covering 1996–2000. We used the diagnostic records of the hospital discharge register and patient  
40  
41 censuses of the National Institute for Health and Welfare, and the records of prescription medicine  
42  
43 purchases and of entitlement to special reimbursement for the medication expenses for certain chronic  
44  
45 diseases maintained by the Social Insurance Institution of Finland. We included indicators for alcohol-  
46  
47 related diseases and accidental poisoning by alcohol, asthma and other chronic obstructive pulmonary  
48  
49 disease (COPD), diabetes and heart disease (for coding see Supplementary Table 1). These chronic  
50  
51 conditions may confound the association between midlife SEP and dementia mortality as the diseases  
52  
53 usually develop over a long period of time and thus reflect health behaviours or health problems already  
54  
55 present in midlife. To account for potential regional variance in socioeconomic characteristics and mortality,  
56  
57  
58  
59  
60

1  
2  
3 we included dummies for region of residence (Western Finland, Helsinki capital region, rest of Southern  
4 Finland, Eastern Finland, and Lapland) and the degree of urbanisation of the municipality of residence, a  
5 variable based on the proportion of population living in urban settlements and the population of the largest  
6 urban settlement in the municipality (urban, semi-urban and rural).  
7  
8  
9

### 10 11 12 **Statistical analyses**

13  
14  
15 We followed the study population for dementia mortality from 1 January 2001 until 31 December 2016.  
16  
17 Individuals were censored on the date of death, at the end of the year preceding emigration, or at the end of  
18 2016, whichever came first.  
19  
20  
21

22  
23 For descriptive statistics, we calculated age-adjusted dementia mortality rates per 10 000 person-years at  
24 risk by indicators of SEP and the covariates. In order to assess the magnitude of socioeconomic inequalities  
25 in relation to age, we estimated Kaplan–Meier survival functions by education, occupational social class  
26 and household income. In these analyses, we contrasted the survival functions of the highest and lowest  
27 education groups, non-manual and manual employees and the highest and lowest household income  
28 quintiles. The equality of survival functions was tested using log-rank tests. For the comparison between  
29 dementia mortality and the more general mortality patterns, separate Kaplan-Meier survival functions were  
30 estimated for mortality from all other causes of death. We also estimated hazard ratios and their 95%  
31 confidence intervals for low versus high socioeconomic groups at the age of 70–79, 80–89 and 90 years  
32 and over.  
33  
34  
35  
36  
37  
38  
39  
40  
41  
42  
43  
44  
45

46 To quantify the contribution of dementia to socioeconomic differences in overall mortality at older ages,  
47 we calculated absolute rate differences in mortality between socioeconomic groups (basic vs. tertiary  
48 education, manual vs. non-manual occupational social class, lowest vs. highest household income quintile)  
49 by cause of death. The contribution was determined by the rate difference in dementia mortality as a  
50 percentage of the rate difference in total mortality. Because the level of dementia mortality increases  
51 substantially with age, we also assessed age-specific contributions (at the age of 70–79, 80–89 and 90+).  
52  
53  
54  
55  
56  
57  
58  
59  
60

1  
2  
3 To estimate the independent associations between each indicator of SEP and dementia mortality, we used  
4  
5 Cox regression models. Attained age in years was used as the time scale, and thus all analyses adjusted for  
6  
7 the confounding effect of age.[17] We first estimated crude associations between each indicator and  
8  
9 dementia mortality, adjusting for calendar year dummies, gender, region of residence and the degree of  
10  
11 urbanisation (model 1). Model 2 included education, occupational social class and household income as  
12  
13 covariates, thus showing mutually adjusted associations. Midlife economic activity was adjusted for in  
14  
15 model 3. We further adjusted for baseline marital status and chronic health conditions in model 4 to assess  
16  
17 the extent to which these confounding factors attenuated the relative hazard attached to each socioeconomic  
18  
19 indicator.  
20  
21  
22  
23

24 We tested for interactions between gender and each socioeconomic indicator using likelihood ratio test.  
25  
26 Interactions were statistically nonsignificant ( $p>0.05$ ), and thus we conducted all analyses for men and  
27  
28 women combined. We also tested for interactions of all pairwise combinations of the socioeconomic  
29  
30 indicators, adjusting for the covariates of model 1. These interactions were all statistically nonsignificant  
31  
32 ( $p>0.05$ ). All analyses were performed using Stata 15.1.[18]  
33  
34  
35

### 36 **Patient and public involvement**

37  
38  
39 No patients were involved in setting the research question or the outcome measures, nor were they involved  
40  
41 in developing plans for design or implementation of the study. No patients were asked to advise on  
42  
43 interpretation or writing up of results. There are no plans to disseminate the results of the research to study  
44  
45 participants or the relevant patient community.  
46  
47  
48

### 49 **Results**

50  
51  
52 Table 1 shows the distribution of the study population by indicators of midlife SEP, economic activity and  
53  
54 baseline characteristics. The vast majority of individuals (77.2%) had no higher than basic education, and  
55  
56 manual employees formed the largest occupational social class (43.6%). Higher household income quintiles  
57  
58 were over-represented among the study population due to the higher incomes of the middle aged compared  
59  
60

1  
2  
3 to the rest of the population and also partly because of greater mortality of the lower income groups between  
4 the time of measurement of midlife income and the baseline. During the 528 387 person-years at risk 11  
5 395 individuals died from dementia, the average age-adjusted dementia mortality rate being 223.1 and  
6 210.8 per 10 000 person-years among men and women, respectively. The rate was higher for those with  
7 lower education, occupational social class and household income, and also for the non-married and people  
8 with chronic health conditions apart from asthma and other COPD.  
9

10  
11  
12 Kaplan–Meier survival functions in Figure 1 show that dementia mortality differed by all indicators of SEP  
13 (log rank test,  $p < 0.001$  for each indicator), and that the age patterns differed between the indicators (for  
14 95% confidence intervals see Supplementary Table 2). The inequalities emerged at an earlier age when  
15 SEP was measured in terms of household income (Panel c) compared to education (Panel a) and  
16 occupational social class (Panel b). At the age of 90 years and above, by contrast, the differences were more  
17 pronounced when SEP was measured in terms of education. Nevertheless, inequalities in dementia  
18 mortality emerged substantially later in life compared to mortality from all other causes. Hazard ratios in  
19 Table 2 show that relative inequalities in mortality tended to diminish with age for all indicators of SEP  
20 regardless of cause of death. However, education differences in dementia mortality showed a different age  
21 pattern in that the point estimates indicated stable inequality with age.  
22  
23  
24  
25  
26  
27  
28  
29  
30  
31  
32  
33  
34  
35  
36  
37  
38  
39  
40

41 Overall, dementia contributed to 28.1% of educational and 20.9% of household income differences in total  
42 mortality at the age of 70 and over (Table 2). The contribution to occupational social class differences was  
43 somewhat smaller (16.7%). The contribution of dementia to socioeconomic inequalities substantially  
44 increased from the age of 70–79 to 90 years and over.  
45  
46  
47  
48  
49  
50

51 Cox regression models in Table 3 show adjusted hazard ratios (HR) for dementia mortality across all ages  
52 from 70 years and over. Adjusted for calendar year, gender, region of residence and the degree of  
53 urbanisation in model 1, the associations were strongest for basic education (HR=1.23, 95% CI 1.15–1.32),  
54 unknown occupational social class (HR=1.20, 1.00–1.44), and the lowest household income quintile  
55  
56  
57  
58  
59  
60

(HR=1.28, 1.20–1.35). Mutual adjustment of socioeconomic indicators in model 2 attenuated educational differences by about 40%, and unknown occupational social class to a non-significant level. Basic education (HR=1.14, 1.06–1.23), manual occupational social class (HR=1.06, 1.01–1.11) and three lowest household income quintiles (for the lowest quintile HR=1.24, 1.16–1.32) all predicted dementia mortality independently of each other. Adjustment for midlife economic activity in model 3 attenuated the excess hazard particularly of the lower household income quintiles. Adjustment for baseline marital status and chronic health conditions in model 4 contributed to a small change in the estimates, the attenuation being largest for the lowest household income quintile. In this full model, basic education increased the hazard of dementia death by 14% (1.06–1.23), manual occupational social class by 5% (1.00–1.10) and the two lowest household income quintiles by 7–13% (HR=1.07, 1.00–1.14 to HR=1.13, 1.06–1.22).

## Discussion

### Main findings and their interpretation

In this study we have shown that dementia mortality at older ages is socioeconomically patterned in terms of multiple indicators of SEP. People with lower education, occupational social class and household income have a higher risk of dementia death compared to those with higher SEP. These results add to the literature on socioeconomic inequalities in old-age mortality, which has previously shown a socioeconomic pattern in many other specific causes of death such as cardiovascular diseases, COPD and cancer.[1] Our results indicate, moreover, that dementia is an important factor in overall socioeconomic inequalities in old-age mortality, contributing to 21–28% of household income and educational differences in total mortality among the population aged 70 and over. The contribution of dementia to overall socioeconomic inequalities in mortality increased substantially with age, which relates to the increasing proportion of deaths attributable to dementia with advancing age.[19]

A major difference in the patterns between dementia mortality and mortality from all other causes of death was that socioeconomic inequalities in dementia mortality emerged later and the inequalities in dementia

1  
2  
3 mortality between high and low education groups persisted in the same magnitude to the oldest old ages  
4 (90 years and above). By contrast, inequalities in mortality from other causes of death tended to diminish  
5  
6 with age. The attenuation of socioeconomic inequalities with age is a general finding,[1,2] and may partly  
7  
8 relate to selective survival, suggesting that people who survive to very old age have more similar health  
9  
10 profiles across socioeconomic groups. Our results show, however, that even among people who survive to  
11  
12 the oldest old age, education groups differ in neurological health. This is a novel finding in that previous  
13  
14 studies have identified consistent socioeconomic inequalities in dementia mortality only among the younger  
15  
16 old[7,8] but the results have been mixed for the oldest old.[8,9] Participation bias may at least partly explain  
17  
18 the differences in findings; people of older age, lower SEP and with health problems are less likely to  
19  
20 participate in surveys and studies involving health examinations. Our study employed register data on a  
21  
22 population-based cohort and thus is not affected by participation or attrition biases.  
23  
24  
25  
26  
27  
28

29 The age patterns in dementia mortality differed between indicators of SEP: while educational differences  
30  
31 were more pronounced among the oldest old (90 years and over), the differences among the younger old  
32  
33 (70–79 years) were largest when SEP was measured in terms of household income. Individuals in the lowest  
34  
35 income quintile represent the most disadvantaged population subgroups with multiple potential dementia  
36  
37 risk factors. Our findings show that the higher dementia mortality of the lowest household income quintiles  
38  
39 was strongly — although not fully — confounded by greater morbidity of these groups. Severe health  
40  
41 problems that were already present in midlife have potentially affected both household incomes and the  
42  
43 risk of dementia death. However, we cannot rule out the possibility of mediation, especially because chronic  
44  
45 health conditions were measured after midlife income; impoverished material conditions may also affect  
46  
47 dementia risk through, for example, health-related behaviours, cardiovascular risk factors[16] and  
48  
49 psychological stress.[20] In the presence of mediation, our estimates would be conservative as they would  
50  
51 overadjust part of the effect of socioeconomic disadvantage. Future studies are needed to establish the  
52  
53 causal relationship between mediating factors and dementia mortality using mediation analysis techniques.  
54  
55  
56  
57  
58  
59  
60

1  
2  
3 Education, in turn, may have particular benefits above and beyond physical health factors among the  
4 population surviving to the oldest old age. Our results show persistent educational differences in dementia  
5 mortality, and the association was not confounded by chronic health conditions, economic activity or  
6 marital status. Education is a well-established predictor of dementia incidence,[21] although the exact  
7 mechanisms are still not known. Brain autopsy studies indicate, in line with the cognitive reserve  
8 hypothesis,[22] that education is not associated with the burden of neuropathology at death but higher  
9 education enables individuals to compensate longer for the neuropathological changes before developing  
10 clinical symptoms of dementia.[23] Thus, it is possible that the educational differences in dementia  
11 mortality we found in our study are due to competing risks; people with higher education died from other  
12 causes before they reached the phase of clinical dementia or died from other causes before dementia  
13 progressed to death. However, the empirical evidence for the cognitive reserve hypothesis remains open to  
14 debate. For example, several studies have not identified educational differences in survival time after  
15 dementia onset,[24] which is among the key hypotheses in the cognitive reserve model.[25] Therefore, it is  
16 plausible that higher education enhances brain health and protects against (or postpones) not only the  
17 clinical symptoms but also the development of neurodegenerative disorders.

18  
19 Occupational social class differences in dementia mortality were modest following adjustment for  
20 education and household income. In particular, the high hazard among those with no occupation  
21 disappeared after these adjustments indicating that this group experienced multiple socioeconomic  
22 disadvantages. The results suggest, nevertheless, that higher social class occupations may involve greater  
23 cognitive demands and intellectual engagement, and thus enhance cognitive health.[26,27] In contrast,  
24 lower class occupations or long periods of economic inactivity due to unemployment or early retirement  
25 may reduce opportunities for cognitive investment. Overall, the results of this study suggest that all three  
26 indicators of SEP are important factors in bringing about socioeconomic differences in dementia mortality,  
27 also influencing inequalities in overall mortality among the older population.

### 28 29 30 31 32 33 34 35 36 37 38 39 40 41 42 43 44 45 46 47 48 49 50 51 52 53 54 55 56 57 58 59 60 **Methodological considerations**



1  
2  
3 We used a unique population-representative sample of older adults in Finland with 11 395 dementia deaths  
4 identified from the National Death Register. The register-based sample was not affected by participation or  
5 attrition bias, which are common limitations of many cohort designs, particularly among the older  
6 population. The population register encompasses rich information on demographic and socioeconomic  
7 characteristics of individuals over the life course, and is not subject to bias from individuals' self-reports  
8 or recollection.  
9

10  
11  
12 Despite the rich register data, our study also has some limitations. First, we could only identify dementia  
13 cases that have been recorded on the death certificate. According to a validation study for identifying  
14 dementia in the Finnish national registers, the documentation of dementia as the cause of death has  
15 improved since the late 1990s, and the specificity is particularly high.[28] To minimise any bias arising  
16 from potential underreporting of dementia as the underlying cause of death, we applied the multiple-cause  
17 approach and included also cases where dementia was recorded as any of the three contributory causes.[29]  
18 Defined this way, we identified 21% of all deaths at the age of 70 and over to be attributable to dementia.  
19 This relatively high proportion is in line with that reported in England and Wales, where dementia  
20 accounted for 19% of all deaths at the age of 80 and over.[30] Furthermore, we ran sensitivity analyses with  
21 interaction with calendar year, and found that the associations between the indicators of SEP and dementia  
22 mortality did not vary in time. Therefore, we believe our results are not biased by overreporting or  
23 underreporting of dementia as the cause of death or by changes in documentation practices.  
24  
25  
26  
27  
28  
29  
30  
31  
32  
33  
34  
35  
36  
37  
38  
39  
40  
41  
42  
43  
44

45  
46 Second, the information of household income was based on taxable income and the variable thus excludes  
47 certain monetary transfers such as housing allowance and social assistance. These means-tested sources of  
48 income may be especially relevant for people with health problems and those outside the labour market.  
49 This might lead to overestimation of the income effect. Information of disposable income was not available  
50 for years 1970–1985, but we carried out a robustness check for the correlation between taxable and  
51 disposable household incomes (as continuous variables) using the population aged 15 and over in 1995 and  
52 found the correlation to be as high as 0.97 (among the population aged 53–57 in 1995 the correlation was  
53  
54  
55  
56  
57  
58  
59  
60

0.98). Therefore, it is unlikely that the use of disposable income would change the ranking of individuals in the household income distribution to the extent that it would affect our main findings.

Finally, the causal relationship between SEP and dementia is difficult to establish in observational studies.

We therefore measured all socioeconomic characteristics 15–30 years before the mortality follow-up, and it is thus very unlikely that any symptoms of dementia affected the midlife socioeconomic attainment of individuals. Nevertheless, we cannot exclude the possibility that early cognitive decline may have affected midlife SEP, especially measured in term of occupational social class and household income. Also, given the small proportion of people with tertiary education in these cohorts (10%), it is possible that this forms a select group with multiple advantages including higher childhood SEP and early cognitive ability. Because register data does not cover information of traditional risk factors related to health behaviours such as smoking and physical activity, we included indicators of chronic conditions to measure cardiovascular and life style risk factors for dementia that may confound the association between SEP and dementia mortality.

## Conclusions

This study provides new insight into the socioeconomic inequalities in old-age mortality by showing a consistent pattern in dementia mortality by multiple indicators of SEP. Low education, occupational social class and household income were all associated with higher risk of dementia death, although the socioeconomic differences emerged later than in mortality from other causes. Household income differences in dementia mortality were more pronounced among the younger old, and the associations were largely attributable to other chronic health conditions such as diabetes and alcohol-related diseases. Educational inequalities, by contrast, were independent of chronic health conditions and became more pronounced at the oldest old age where mortality inequalities generally begin to attenuate. The results indicate that dementia mortality may be amenable to socioeconomic interventions in midlife. The findings also suggest that dementia contributes to socioeconomic inequalities in overall mortality at older ages and,

1  
2  
3 thus, dementia prevention is important from the point of view of socioeconomic inequalities in total  
4  
5 mortality.  
6  
7  
8  
9  
10  
11  
12  
13  
14  
15  
16  
17  
18  
19  
20  
21  
22  
23  
24  
25  
26  
27  
28  
29  
30  
31  
32  
33  
34  
35  
36  
37  
38  
39  
40  
41  
42  
43  
44  
45  
46  
47  
48  
49  
50  
51  
52  
53  
54  
55  
56  
57  
58  
59  
60

For peer review only

## REFERENCES

- 1 Huisman M, Kunst AE, Bopp M, *et al.* Educational inequalities in cause-specific mortality in middle-aged and older men and women in eight western European populations. *The Lancet* 2005;**365**:493–500.
- 2 Huisman M, Read S, Towriss CA, *et al.* Socioeconomic Inequalities in Mortality Rates in Old Age in the World Health Organization Europe Region. *Epidemiol Rev* 2013;**35**:84–97.
- 3 Marmot MG, Shipley MJ. Do socioeconomic differences in mortality persist after retirement? 25 Year follow up of civil servants from the first Whitehall study. *BMJ* 1996;**313**:1177–80.
- 4 Demakakos P, Biddulph JP, Bobak M, *et al.* Wealth and mortality at older ages: a prospective cohort study. *J Epidemiol Community Health* 2016;**70**:346–353.
- 5 Prince M, Wimo A, Guerchet M, *et al.* World Alzheimer Report 2015—The Global Impact of Dementia: an analysis of prevalence, incidence, cost and trends. 2015. Available: <https://www.alz.co.uk/research/WorldAlzheimerReport2015.pdf> (accessed 13 Sep 2017).
- 6 Office for National Statistics. Deaths registered in England and Wales (series DR): 2016. 2017. Available: <https://www.ons.gov.uk/peoplepopulationandcommunity/birthsdeathsandmarriages/deaths/bulletins/deathsregisteredinenglandandwalesseriesdr/2016#dementia-and-alzheimer-disease-remained-the-leading-cause-of-death-in-2016> (accessed 20 Sep 2019).
- 7 Russ TC, Stamatakis E, Hamer M, *et al.* Socioeconomic status as a risk factor for dementia death: individual participant meta-analysis of 86 508 men and women from the UK. *The British journal of psychiatry* 2013;**203**:10–17.
- 8 Strand BH, Langballe EM, Rosness TA, *et al.* Age, education and dementia related deaths. The Norwegian Counties Study and the Cohort of Norway. *Journal of the neurological sciences* 2014;**345**:75–82.
- 9 Enroth L, Raitanen J, Hervonen A, *et al.* Is socioeconomic status a predictor of mortality in nonagenarians? The vitality 90+ study. *Age and ageing* 2014;**44**:123–129.
- 10 Martelin T. Mortality by indicators of socioeconomic status among the Finnish elderly. *Social science & medicine* 1994;**38**:1257–1278.
- 11 Martikainen P, Blomgren J, Valkonen T. Change in the total and independent effects of education and occupational social class on mortality: analyses of all Finnish men and women in the period 1971–2000. *Journal of Epidemiology & Community Health* 2007;**61**:499–505.
- 12 Rognerud MA, Zahl P-H. Social inequalities in mortality: changes in the relative importance of income, education and household size over a 27-year period. *The European Journal of Public Health* 2005;**16**:62–68.
- 13 Geyer S, Hemström Ö, Peter R, *et al.* Education, income, and occupational class cannot be used interchangeably in social epidemiology. Empirical evidence against a common practice. *Journal of Epidemiology & Community Health* 2006;**60**:804–810.
- 14 Strand BH, Skirbekk V, Rosness TA, *et al.* Income in midlife and dementia related mortality over three decades: A Norwegian prospective study. *eNeurologicalSci* 2015;**1**:24–29.

- 1  
2  
3 15 OECD. *OECD Framework for Statistics on the Distribution of Household Income, Consumption and*  
4 *Wealth*. Paris: OECD Publishing 2013. Available: <http://dx.doi.org/10.1787/9789264194830-en>  
5 (accessed 3 May 2018).  
6  
7 16 Baumgart M, Snyder HM, Carrillo MC, *et al*. Summary of the evidence on modifiable risk factors for  
8 cognitive decline and dementia: a population-based perspective. *Alzheimer's & dementia: the journal*  
9 *of the Alzheimer's Association* 2015;**11**:718–726.  
10  
11 17 Lamarca R, Alonso J, Gómez G, *et al*. Left-truncated data with age as time scale: an alternative for  
12 survival analysis in the elderly population. *The Journals of Gerontology Series A: Biological Sciences*  
13 *and Medical Sciences* 1998;**53**:M337–M343.  
14  
15 18 StataCorp. *Stata Statistical Software: Release 15*. College Station, TX: StataCorp LLC. 2017.  
16  
17 19 Knapp M, Prince M, Albanese E, *et al*. *Dementia UK: The full report*. London: Alzheimer's Society  
18 2007.  
19  
20 20 Johansson L, Guo X, Waern M, *et al*. Midlife psychological stress and risk of dementia: a 35-year  
21 longitudinal population study. *Brain* 2010;**133**:2217–2224.  
22  
23 21 Livingston G, Sommerlad A, Orgeta V, *et al*. Dementia prevention, intervention, and care. *The Lancet*  
24 Published Online First: 2017. Available: [https://tbhtoolkits.com/media/Dementia-Prevention-](https://tbhtoolkits.com/media/Dementia-Prevention-Intervention-and-Care-Lancet-2017-1.pdf)  
25 [Intervention-and-Care-Lancet-2017-1.pdf](https://tbhtoolkits.com/media/Dementia-Prevention-Intervention-and-Care-Lancet-2017-1.pdf) (accessed 11 Sep 2017).  
26  
27 22 Stern Y. What is cognitive reserve? Theory and research application of the reserve concept. *Journal*  
28 *of the International Neuropsychological Society* 2002;**8**:448–460.  
29  
30 23 Brayne C, Ince PG, Keage HA, *et al*. Education, the brain and dementia: neuroprotection or  
31 compensation? EClipSE Collaborative Members. *Brain* 2010;**133**:2210–2216.  
32  
33 24 Paradise M, Cooper C, Livingston G. Systematic review of the effect of education on survival in  
34 Alzheimer's disease. *International psychogeriatrics* 2009;**21**:25–32.  
35  
36 25 Stern Y, Tang MX, Denaro J, *et al*. Increased risk of mortality in Alzheimer's disease patients with  
37 more advanced educational and occupational attainment. *Annals of Neurology: Official Journal of the*  
38 *American Neurological Association and the Child Neurology Society* 1995;**37**:590–595.  
39  
40 26 Kröger E, Andel R, Lindsay J, *et al*. Is complexity of work associated with risk of dementia? The  
41 Canadian Study of Health and Aging. *American journal of epidemiology* 2008;**167**:820–830.  
42  
43 27 Karp A, Andel R, Parker MG, *et al*. Mentally stimulating activities at work during midlife and  
44 dementia risk after age 75: follow-up study from the Kungsholmen Project. *The American Journal of*  
45 *Geriatric Psychiatry* 2009;**17**:227–236.  
46  
47 28 Solomon A, Ngandu T, Soininen H, *et al*. Validity of dementia and Alzheimer's disease diagnoses in  
48 Finnish national registers. *Alzheimer's & Dementia* 2014;**10**:303–309. doi:10.1016/j.jalz.2013.03.004  
49  
50 29 Garcia-Ptacek S, Kåreholt I, Cermakova P, *et al*. Causes of Death According to Death Certificates in  
51 Individuals with Dementia: A Cohort from the Swedish Dementia Registry. *Journal of the American*  
52 *Geriatrics Society* 2016;**64**. doi:10.1111/jgs.14421  
53  
54  
55  
56  
57  
58  
59  
60

1  
2  
3  
4  
5  
6  
7  
8  
9  
10  
11  
12  
13  
14  
15  
16  
17  
18  
19  
20  
21  
22  
23  
24  
25  
26  
27  
28  
29  
30  
31  
32  
33  
34  
35  
36  
37  
38  
39  
40  
41  
42  
43  
44  
45  
46  
47  
48  
49  
50  
51  
52  
53  
54  
55  
56  
57  
58  
59  
60

30 Office for National Statistics. Deaths registered in England and Wales, 2016 (dataset). 2017. Available: <https://www.ons.gov.uk/file?uri=/peoplepopulationandcommunity/birthsdeathsandmarriages/deaths/datasets/deathsregisteredinenglandandwalesseriesdrreferencetables/2016/drtables16.xls> (accessed 20 Sep 2019).

For peer review only

## Footnotes

**Contributors:** KK, EE, TL, LT and PM participated in designing the study, generating hypotheses, interpreting the data and critically revised the manuscript for important intellectual content. KK analysed the data, conducted the literature review and wrote the first draft of the manuscript.

**Funding:** KK was supported by the Eino Jutikkala Fund. PM was supported by the Academy of Finland, and the Strategic Research Council PROMEQ project (#303615). PM was also supported by the European Union Horizon2020 Programme under grant agreement n° 667661 (Promoting mental wellbeing in the ageing population - MINDMAP). The study does not necessarily reflect the Commission's views and in no way anticipates the Commission's future policy in this area. The funders had no role in study design, data collection and analysis, decision to publish, or preparation of the manuscript.

**Competing interests:** None declared.

**Data sharing statement:** Statistics Finland, the National Institute for Health and Welfare and the Social Insurance Institution of Finland have collected and own the data. Due to data protection regulations, the authors are not allowed to make the data available to third parties. Researchers can apply for data access by contacting the register-holding institutions: Statistics Finland ([http://stat.fi/index\\_en.html](http://stat.fi/index_en.html)); National Institute for Health and Welfare (<https://thl.fi/en>); Social Insurance Institution of Finland (<https://www.kela.fi/web/en>).

**Ethics approval:** The study has been approved by Statistics Finland Board of Ethics (permit TK-53-339-13). The data were collected for routine administrative registration purposes and, therefore, informed consent of the participants was not obtained. These register data can be used for scientific purposes under the Personal Data Act and the Statistics Act. Statistics Finland anonymised the data prior to providing them to researchers.

**Table 1.** Distribution of the study population, dementia deaths and age-adjusted dementia mortality rates (per 10 000 person-years) by indicators of midlife socioeconomic position and economic activity and baseline characteristics, Finnish men and women in 2001–2016

|                                        | N             | %    | Dementia deaths |       |             |
|----------------------------------------|---------------|------|-----------------|-------|-------------|
|                                        |               |      | n               | Rate  | 95% CI      |
| Mean age at baseline (SD)              | 76.4<br>(4.8) |      |                 |       |             |
| Gender                                 |               |      |                 |       |             |
| Men                                    | 20100         | 36.6 | 3409            | 223.1 | 215.6–230.5 |
| Women                                  | 34864         | 63.4 | 7986            | 210.8 | 206.3–215.4 |
| Education <sup>a</sup>                 |               |      |                 |       |             |
| Tertiary                               | 5445          | 9.9  | 1014            | 185.5 | 174.3–196.7 |
| Secondary                              | 7074          | 12.9 | 1446            | 205.7 | 195.4–216.1 |
| Basic                                  | 42445         | 77.2 | 8936            | 221.8 | 217.3–226.3 |
| Occupational social class <sup>a</sup> |               |      |                 |       |             |
| Non-manual                             | 17015         | 31.0 | 3524            | 201.1 | 194.6–207.6 |
| Manual                                 | 23951         | 43.6 | 4882            | 228.4 | 222.1–234.6 |
| Self-employed farmer                   | 10204         | 18.6 | 2211            | 215.7 | 206.9–224.6 |
| Other self-employed                    | 3271          | 6.0  | 657             | 212.2 | 196.3–228.1 |
| No occupation/unknown                  | 523           | 1.0  | 121             | 239.2 | 196.5–282.0 |
| Household income <sup>a</sup>          |               |      |                 |       |             |
| Highest quintile                       | 13667         | 24.9 | 2715            | 196.9 | 189.7–204.2 |
| 2nd                                    | 10522         | 19.1 | 2098            | 209.6 | 200.9–218.4 |
| 3rd                                    | 10110         | 18.4 | 2114            | 217.3 | 208.2–226.3 |
| 4th                                    | 10292         | 18.7 | 2183            | 223.2 | 214.0–232.3 |
| Lowest quintile                        | 10373         | 18.9 | 2285            | 241.5 | 231.8–251.2 |
| Economic activity <sup>a</sup>         |               |      |                 |       |             |
| Active                                 | 37266         | 67.8 | 7585            | 208.1 | 203.6–212.7 |
| Retired                                | 8881          | 16.2 | 1742            | 257.1 | 245.2–269.0 |
| Other inactive                         | 8817          | 16.0 | 2068            | 212.7 | 203.7–221.8 |
| Marital status                         |               |      |                 |       |             |
| Married                                | 24789         | 45.1 | 4471            | 208.7 | 202.6–214.8 |
| Divorced                               | 4056          | 7.4  | 797             | 237.0 | 220.9–253.2 |
| Widowed                                | 20997         | 38.2 | 5000            | 214.3 | 208.4–220.3 |
| Never married                          | 5122          | 9.3  | 1127            | 240.9 | 227.2–254.7 |
| Chronic health conditions              |               |      |                 |       |             |
| Alcohol-related diseases               | 308           | 0.6  | 68              | 505.3 | 381.2–629.3 |
| Asthma and COPD                        | 4510          | 8.2  | 789             | 232.9 | 216.9–248.9 |
| Diabetes                               | 6714          | 12.2 | 1240            | 275.0 | 259.8–290.2 |



|                          |       |       |       |       |             |
|--------------------------|-------|-------|-------|-------|-------------|
| Heart disease            | 18094 | 32.9  | 3562  | 237.1 | 229.5–244.7 |
| Region of residence      |       |       |       |       |             |
| Western Finland          | 25078 | 45.6  | 4979  | 204.1 | 198.6–209.7 |
| Helsinki capital region  | 7449  | 13.6  | 1582  | 208.3 | 198.3–218.4 |
| Rest of Southern Finland | 12056 | 21.9  | 2464  | 214.8 | 206.5–223.0 |
| Eastern Finland          | 8458  | 15.4  | 1916  | 250.1 | 239.2–261.0 |
| Lapland                  | 1923  | 3.5   | 454   | 261.5 | 238.1–285.0 |
| Degree of urbanisation   |       |       |       |       |             |
| Urban                    | 29853 | 51.0  | 6401  | 217.2 | 212.0–222.4 |
| Semi-urban               | 9285  | 17.7  | 1831  | 210.6 | 201.2–220.0 |
| Rural                    | 15826 | 31.3  | 3163  | 215.3 | 208.0–222.7 |
| Total                    | 54964 | 100.0 | 11395 | 215.7 | 211.7–219.7 |

Abbreviations: CI, confidence intervals; COPD, chronic obstructive pulmonary diseases

<sup>a</sup> Information from the population censuses of 1970–1985, the study population being aged 53–57 years

**Table 2.** Relative and absolute differences in mortality between high and low socioeconomic groups<sup>a</sup> by cause of death and age, and contribution (%) of dementia and other causes of death to socioeconomic differences in total mortality by age, Finnish men and women in 2001–2016

|                                              | 70–79 years |           |                 |                  | 80–89 years |           |                 |                  | 90+ years |           |                 |                  | All ages 70+     |
|----------------------------------------------|-------------|-----------|-----------------|------------------|-------------|-----------|-----------------|------------------|-----------|-----------|-----------------|------------------|------------------|
|                                              | HR          | 95% CI    | Rate difference | Contribution (%) | HR          | 95% CI    | Rate difference | Contribution (%) | HR        | 95% CI    | Rate difference | Contribution (%) | Contribution (%) |
| <b>Education<sup>b</sup></b>                 |             |           |                 |                  |             |           |                 |                  |           |           |                 |                  |                  |
| Dementia                                     | 1.24        | 0.97–1.58 | 8.7             | 8.3              | 1.19        | 1.09–1.29 | 40.4            | 33.5             | 1.24      | 1.10–1.40 | 157.9           | 51.8             | 28.1             |
| Other causes                                 | 1.38        | 1.26–1.50 | 96.1            | 91.7             | 1.11        | 1.06–1.17 | 83.0            | 68.9             | 1.13      | 1.03–1.24 | 146.9           | 48.2             | 71.8             |
| Total mortality                              | 1.36        | 1.25–1.48 | 104.8           | 100.0            | 1.13        | 1.09–1.18 | 120.4           | 102.4            | 1.17      | 1.09–1.26 | 304.8           | 100.0            | 100.0            |
| <b>Occupational social class<sup>c</sup></b> |             |           |                 |                  |             |           |                 |                  |           |           |                 |                  |                  |
| Dementia                                     | 1.22        | 1.03–1.44 | 7.7             | 6.3              | 1.17        | 1.10–1.23 | 35.3            | 20.3             | 1.09      | 1.00–1.17 | 63.5            | 22.8             | 16.7             |
| Other causes                                 | 1.44        | 1.36–1.53 | 114.2           | 93.8             | 1.24        | 1.20–1.29 | 138.7           | 79.7             | 1.19      | 1.12–1.27 | 215.0           | 77.2             | 83.3             |
| Total mortality                              | 1.41        | 1.34–1.49 | 121.8           | 100.1            | 1.22        | 1.19–1.26 | 173.9           | 100.0            | 1.15      | 1.09–1.21 | 278.4           | 100.0            | 100.0            |
| <b>Household income<sup>d</sup></b>          |             |           |                 |                  |             |           |                 |                  |           |           |                 |                  |                  |
| Dementia                                     | 1.63        | 1.32–2.01 | 22.4            | 12.9             | 1.22        | 1.14–1.31 | 46.3            | 21.4             | 1.19      | 1.08–1.32 | 135.6           | 35.2             | 20.9             |
| Other causes                                 | 1.54        | 1.43–1.66 | 151.0           | 87.1             | 1.24        | 1.19–1.30 | 169.7           | 78.6             | 1.19      | 1.10–1.28 | 249.1           | 64.8             | 79.2             |
| Total mortality                              | 1.55        | 1.44–1.67 | 173.3           | 100.0            | 1.24        | 1.19–1.29 | 216.0           | 100.0            | 1.19      | 1.12–1.26 | 384.7           | 100.0            | 100.0            |

Abbreviations: CI, confidence interval; HR, hazard ratio  
Hazard ratios adjusted for calendar year. Age-adjusted incidence rates calculated as dementia deaths per 10,000 person-years at risk. Contribution of dementia determined by the rate difference in dementia mortality as a percentage of the rate difference in total mortality

<sup>a</sup> Information from the population censuses of 1970–1985, the study population being aged 53–57 years

<sup>b</sup> Tertiary vs. basic education

<sup>c</sup> Non-manual vs. manual occupational social class

<sup>d</sup> Highest vs. lowest household income quintiles

**Table 3.** Hazard ratios and 95% confidence intervals for dementia mortality by indicators of midlife socioeconomic position<sup>a</sup>, Finnish men and women in 2001–2016, n=54,964

| Indicator of socioeconomic position | Model 1 <sup>b</sup> |           | Model 2 <sup>c</sup> |           | Model 3 <sup>d</sup> |           | Model 4 <sup>e</sup> |           |
|-------------------------------------|----------------------|-----------|----------------------|-----------|----------------------|-----------|----------------------|-----------|
|                                     | HR                   | 95% CI    | HR                   | 95% CI    | HR                   | 95% CI    | HR                   | 95% CI    |
| Education                           |                      |           |                      |           |                      |           |                      |           |
| Tertiary                            | 1.00                 |           | 1.00                 |           | 1.00                 |           | 1.00                 |           |
| Secondary                           | 1.14                 | 1.05–1.23 | 1.08                 | 0.99–1.17 | 1.08                 | 0.99–1.17 | 1.08                 | 0.99–1.18 |
| Basic                               | 1.23                 | 1.15–1.32 | 1.14                 | 1.06–1.23 | 1.14                 | 1.05–1.22 | 1.14                 | 1.06–1.23 |
| Occupational social class           |                      |           |                      |           |                      |           |                      |           |
| Non-manual                          | 1.00                 |           | 1.00                 |           | 1.00                 |           | 1.00                 |           |
| Manual                              | 1.14                 | 1.09–1.20 | 1.06                 | 1.01–1.11 | 1.05                 | 1.00–1.11 | 1.05                 | 1.00–1.10 |
| Farmer                              | 1.08                 | 1.02–1.15 | 0.96                 | 0.90–1.03 | 0.97                 | 0.91–1.04 | 0.98                 | 0.92–1.05 |
| Other self-employed                 | 1.05                 | 0.96–1.14 | 0.98                 | 0.90–1.07 | 0.99                 | 0.91–1.08 | 1.00                 | 0.92–1.09 |
| No occupation/unknown               | 1.20                 | 1.00–1.44 | 1.04                 | 0.87–1.25 | 0.94                 | 0.78–1.14 | 0.94                 | 0.78–1.13 |
| Household income                    |                      |           |                      |           |                      |           |                      |           |
| Highest quintile                    | 1.00                 |           | 1.00                 |           | 1.00                 |           | 1.00                 |           |
| 2nd                                 | 1.08                 | 1.02–1.14 | 1.04                 | 0.98–1.10 | 1.03                 | 0.98–1.10 | 1.02                 | 0.96–1.09 |
| 3rd                                 | 1.13                 | 1.07–1.20 | 1.08                 | 1.02–1.15 | 1.07                 | 1.00–1.14 | 1.05                 | 0.99–1.12 |
| 4th                                 | 1.17                 | 1.10–1.24 | 1.13                 | 1.06–1.20 | 1.10                 | 1.03–1.17 | 1.07                 | 1.00–1.14 |
| Lowest quintile                     | 1.28                 | 1.20–1.35 | 1.24                 | 1.16–1.32 | 1.18                 | 1.10–1.26 | 1.13                 | 1.06–1.22 |

Abbreviations: CI, confidence interval; HR, hazard ratio

All models used age as time scale and adjusted for calendar year, gender, region of residence and the degree of urbanisation

<sup>a</sup> Information from the population censuses of 1970–1985, the study population being aged 53–57 years

<sup>b</sup> Model 1: each indicator of socioeconomic position separately

<sup>c</sup> Model 2: indicators of socioeconomic position mutually adjusted

<sup>d</sup> Model 3: model 2 + midlife economic activity

<sup>e</sup> Model 4: model 3 + baseline marital status and chronic health conditions (alcohol-related diseases, asthma and chronic obstructive pulmonary disease, diabetes and heart disease)

1  
2  
3 **Figure 1.** Kaplan–Meier survival probabilities for dementia mortality and mortality from all other causes  
4 of death by a) education, b) occupational social class and c) household income quintile (Q1=highest,  
5 Q5=lowest), Finnish men and women in 2001–2016. Information of midlife socioeconomic position  
6 obtained from the population censuses of 1970–1985, the study population being aged 53–57 years  
7  
8  
9  
10  
11  
12  
13  
14  
15  
16  
17  
18  
19  
20  
21  
22  
23  
24  
25  
26  
27  
28  
29  
30  
31  
32  
33  
34  
35  
36  
37  
38  
39  
40  
41  
42  
43  
44  
45  
46  
47  
48  
49  
50  
51  
52  
53  
54  
55  
56  
57  
58  
59  
60

For peer review only

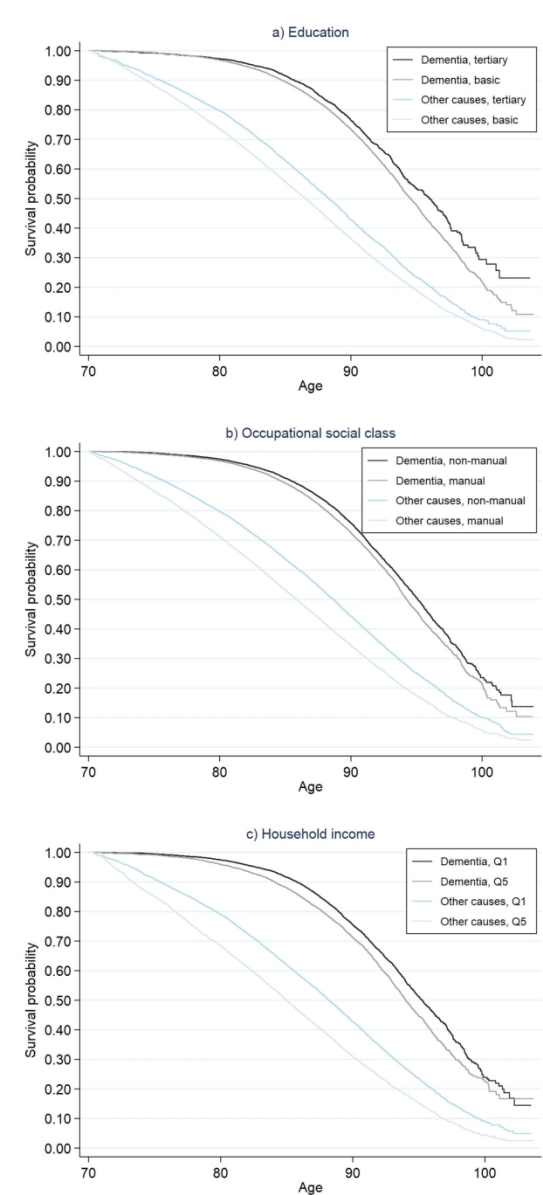

Figure 1. Kaplan–Meier survival probabilities for dementia mortality and mortality from all other causes of death by a) education, b) occupational social class and c) household income quintile (Q1=highest, Q5=lowest), Finnish men and women in 2001–2016. Information of midlife socioeconomic position obtained from the population censuses of 1970–1985, the study population being aged 53–57 years

122x265mm (300 x 300 DPI)

**Supplementary Table 1.** Classification of chronic health conditions used as covariates in the study

| Condition                                                    | Hospital diagnoses (ICD-10)                                               | Prescription medication (ATC) | Special reimbursement category (Finnish disease code) |
|--------------------------------------------------------------|---------------------------------------------------------------------------|-------------------------------|-------------------------------------------------------|
| Alcohol-related diseases and accidental poisoning by alcohol | F10–19, G31.2, G40.51, G62.1, G72.1, I42.6, K29.2, K70, K86.0, O35.4, X45 |                               |                                                       |
| Asthma and other COPD                                        | J43–46                                                                    |                               | 203                                                   |
| Diabetes                                                     | E10–14                                                                    | A10                           | 103                                                   |
| Heart disease                                                | I00–09, I20–52                                                            |                               | 201, 206, 207                                         |

Abbreviations: ATC, Anatomical Therapeutic Chemical; COPD, chronic obstructive pulmonary diseases; ICD, International Classification of Diseases

review only

**Supplementary Table 2.** Kaplan-Meier survival probabilities at specific ages by midlife a) education, b) occupational social class and c) household income quintile (Q1=highest, Q5=lowest), Finnish men and women in 2001–2016

|                                     | Age | Dementia          |           | Other causes      |           |
|-------------------------------------|-----|-------------------|-----------|-------------------|-----------|
|                                     |     | Survivor function | 95% CI    | Survivor function | 95% CI    |
| <b>a) Education</b>                 |     |                   |           |                   |           |
| Tertiary                            | 70  | 1.00              |           | 1.00              |           |
|                                     | 75  | 0.99              | 0.99–1.00 | 0.91              | 0.89–0.92 |
|                                     | 80  | 0.97              | 0.97–0.98 | 0.80              | 0.78–0.82 |
|                                     | 85  | 0.92              | 0.90–0.92 | 0.63              | 0.61–0.65 |
|                                     | 90  | 0.76              | 0.75–0.78 | 0.43              | 0.41–0.44 |
|                                     | 95  | 0.53              | 0.50–0.56 | 0.23              | 0.22–0.25 |
|                                     | 100 | 0.29              | 0.24–0.35 | 0.09              | 0.07–0.11 |
| Basic                               | 70  | 1.00              |           | 1.00              |           |
|                                     | 75  | 0.99              | 0.99–1.00 | 0.88              | 0.87–0.89 |
|                                     | 80  | 0.97              | 0.97–0.97 | 0.74              | 0.73–0.74 |
|                                     | 85  | 0.89              | 0.89–0.90 | 0.56              | 0.55–0.56 |
|                                     | 90  | 0.73              | 0.73–0.74 | 0.36              | 0.36–0.37 |
|                                     | 95  | 0.48              | 0.47–0.49 | 0.19              | 0.18–0.20 |
|                                     | 100 | 0.22              | 0.20–0.24 | 0.06              | 0.05–0.07 |
| <b>b) Occupational social class</b> |     |                   |           |                   |           |
| Non-manual                          | 70  | 1.00              |           | 1.00              |           |
|                                     | 75  | 1.00              | 0.99–1.00 | 0.92              | 0.90–0.93 |
|                                     | 80  | 0.97              | 0.97–0.98 | 0.80              | 0.79–0.81 |
|                                     | 85  | 0.91              | 0.90–0.92 | 0.64              | 0.63–0.65 |
|                                     | 90  | 0.76              | 0.75–0.77 | 0.44              | 0.43–0.45 |
|                                     | 95  | 0.51              | 0.49–0.52 | 0.25              | 0.24–0.26 |
|                                     | 100 | 0.24              | 0.21–0.27 | 0.10              | 0.09–0.11 |
| Manual                              | 70  | 1.00              |           | 1.00              |           |
|                                     | 75  | 0.99              | 0.99–0.99 | 0.87              | 0.85–0.88 |
|                                     | 80  | 0.97              | 0.96–0.97 | 0.71              | 0.70–0.72 |
|                                     | 85  | 0.89              | 0.89–0.90 | 0.53              | 0.52–0.54 |
|                                     | 90  | 0.73              | 0.72–0.73 | 0.34              | 0.34–0.35 |
|                                     | 95  | 0.46              | 0.45–0.47 | 0.17              | 0.17–0.18 |
|                                     | 100 | 0.21              | 0.18–0.24 | 0.06              | 0.05–0.07 |

1  
2  
3  
4  
5  
6  
7  
8  
9  
10  
11  
12  
13  
14  
15  
16  
17  
18  
19  
20  
21  
22  
23  
24  
25  
26  
27  
28  
29  
30  
31  
32  
33  
34  
35  
36  
37  
38  
39  
40  
41  
42  
43  
44  
45  
46  
47  
48  
49  
50  
51  
52  
53  
54  
55  
56  
57  
58  
59  
60

|                     | Age | Dementia          |           | Other causes      |           |
|---------------------|-----|-------------------|-----------|-------------------|-----------|
|                     |     | Survivor function | 95% CI    | Survivor function | 95% CI    |
| c) Household income |     |                   |           |                   |           |
| Q1                  | 70  | 1.00              |           | 1.00              |           |
|                     | 75  | 0.99              | 0.99–1.00 | 0.91              | 0.90–0.92 |
|                     | 80  | 0.97              | 0.97–0.98 | 0.79              | 0.78–0.80 |
|                     | 85  | 0.92              | 0.91–0.92 | 0.62              | 0.61–0.63 |
|                     | 90  | 0.75              | 0.74–0.76 | 0.43              | 0.42–0.44 |
|                     | 95  | 0.51              | 0.49–0.53 | 0.24              | 0.22–0.25 |
| Q5                  | 100 | 0.24              | 0.20–0.28 | 0.09              | 0.08–0.11 |
|                     | 70  | 1.00              |           | 1.00              |           |
|                     | 75  | 0.99              | 0.99–1.00 | 0.85              | 0.83–0.87 |
|                     | 80  | 0.96              | 0.95–0.97 | 0.68              | 0.67–0.70 |
|                     | 85  | 0.88              | 0.87–0.89 | 0.50              | 0.48–0.51 |
|                     | 90  | 0.71              | 0.70–0.72 | 0.31              | 0.30–0.32 |
|                     | 95  | 0.45              | 0.43–0.47 | 0.15              | 0.14–0.16 |
|                     | 100 | 0.23              | 0.19–0.26 | 0.04              | 0.04–0.06 |



STROBE Statement—Checklist of items that should be included in reports of *cohort studies*

|                              | Item No | Recommendation                                                                                                                                                                                                                                                                                                         | Page No                         |
|------------------------------|---------|------------------------------------------------------------------------------------------------------------------------------------------------------------------------------------------------------------------------------------------------------------------------------------------------------------------------|---------------------------------|
| <b>Title and abstract</b>    | 1       | (a) Indicate the study's design with a commonly used term in the title or the abstract<br>(b) Provide in the abstract an informative and balanced summary of what was done and what was found                                                                                                                          | 1<br>2-3                        |
| <b>Introduction</b>          |         |                                                                                                                                                                                                                                                                                                                        |                                 |
| Background/rationale         | 2       | Explain the scientific background and rationale for the investigation being reported                                                                                                                                                                                                                                   | 4-5                             |
| Objectives                   | 3       | State specific objectives, including any prespecified hypotheses                                                                                                                                                                                                                                                       | 5                               |
| <b>Methods</b>               |         |                                                                                                                                                                                                                                                                                                                        |                                 |
| Study design                 | 4       | Present key elements of study design early in the paper                                                                                                                                                                                                                                                                | 6                               |
| Setting                      | 5       | Describe the setting, locations, and relevant dates, including periods of recruitment, exposure, follow-up, and data collection                                                                                                                                                                                        | 6-7                             |
| Participants                 | 6       | (a) Give the eligibility criteria, and the sources and methods of selection of participants. Describe methods of follow-up<br>(b) For matched studies, give matching criteria and number of exposed and unexposed                                                                                                      | 6                               |
| Variables                    | 7       | Clearly define all outcomes, exposures, predictors, potential confounders, and effect modifiers. Give diagnostic criteria, if applicable                                                                                                                                                                               | 6-8                             |
| Data sources/<br>measurement | 8*      | For each variable of interest, give sources of data and details of methods of assessment (measurement). Describe comparability of assessment methods if there is more than one group                                                                                                                                   | 6-7                             |
| Bias                         | 9       | Describe any efforts to address potential sources of bias                                                                                                                                                                                                                                                              | 8-9,<br>14-<br>15               |
| Study size                   | 10      | Explain how the study size was arrived at                                                                                                                                                                                                                                                                              | 6                               |
| Quantitative variables       | 11      | Explain how quantitative variables were handled in the analyses. If applicable, describe which groupings were chosen and why                                                                                                                                                                                           | 6-9                             |
| Statistical methods          | 12      | (a) Describe all statistical methods, including those used to control for confounding<br>(b) Describe any methods used to examine subgroups and interactions<br>(c) Explain how missing data were addressed<br>(d) If applicable, explain how loss to follow-up was addressed<br>(e) Describe any sensitivity analyses | 8-9<br>9<br>6<br>8<br>14-<br>15 |
| <b>Results</b>               |         |                                                                                                                                                                                                                                                                                                                        |                                 |
| Participants                 | 13*     | (a) Report numbers of individuals at each stage of study—eg numbers potentially eligible, examined for eligibility, confirmed eligible, included in the study, completing follow-up, and analysed<br>(b) Give reasons for non-participation at each stage<br>(c) Consider use of a flow diagram                        | 9-10<br>NA                      |
| Descriptive data             | 14*     | (a) Give characteristics of study participants (eg demographic, clinical, social) and information on exposures and potential confounders<br>(b) Indicate number of participants with missing data for each variable of interest<br>(c) Summarise follow-up time (eg, average and total amount)                         | 9-10<br>6-7<br>10               |
| Outcome data                 | 15*     | Report numbers of outcome events or summary measures over time                                                                                                                                                                                                                                                         | 10                              |

|    |                          |    |                                                                                                                                                                                                              |       |
|----|--------------------------|----|--------------------------------------------------------------------------------------------------------------------------------------------------------------------------------------------------------------|-------|
| 1  | Main results             | 16 | (a) Give unadjusted estimates and, if applicable, confounder-adjusted estimates and their precision (eg, 95% confidence interval). Make clear which confounders were adjusted for and why they were included | 10-11 |
| 2  |                          |    | (b) Report category boundaries when continuous variables were categorized                                                                                                                                    |       |
| 3  |                          |    | (c) If relevant, consider translating estimates of relative risk into absolute risk for a meaningful time period                                                                                             |       |
| 4  |                          |    |                                                                                                                                                                                                              |       |
| 5  |                          |    |                                                                                                                                                                                                              |       |
| 6  |                          |    |                                                                                                                                                                                                              |       |
| 7  |                          |    |                                                                                                                                                                                                              |       |
| 8  |                          |    |                                                                                                                                                                                                              |       |
| 9  | Other analyses           | 17 | Report other analyses done—eg analyses of subgroups and interactions, and sensitivity analyses                                                                                                               | 9     |
| 10 |                          |    |                                                                                                                                                                                                              |       |
| 11 | <b>Discussion</b>        |    |                                                                                                                                                                                                              |       |
| 12 |                          |    |                                                                                                                                                                                                              |       |
| 13 | Key results              | 18 | Summarise key results with reference to study objectives                                                                                                                                                     | 11    |
| 14 | Limitations              | 19 | Discuss limitations of the study, taking into account sources of potential bias or imprecision. Discuss both direction and magnitude of any potential bias                                                   | 14-15 |
| 15 |                          |    |                                                                                                                                                                                                              |       |
| 16 | Interpretation           | 20 | Give a cautious overall interpretation of results considering objectives, limitations, multiplicity of analyses, results from similar studies, and other relevant evidence                                   | 11-13 |
| 17 |                          |    |                                                                                                                                                                                                              |       |
| 18 |                          |    |                                                                                                                                                                                                              |       |
| 19 | Generalisability         | 21 | Discuss the generalisability (external validity) of the study results                                                                                                                                        | 14-15 |
| 20 |                          |    |                                                                                                                                                                                                              |       |
| 21 | <b>Other information</b> |    |                                                                                                                                                                                                              |       |
| 22 |                          |    |                                                                                                                                                                                                              |       |
| 23 | Funding                  | 22 | Give the source of funding and the role of the funders for the present study and, if applicable, for the original study on which the present article is based                                                | 19    |
| 24 |                          |    |                                                                                                                                                                                                              |       |

25  
26  
27 \*Give information separately for exposed and unexposed groups.

28  
29 **Note:** An Explanation and Elaboration article discusses each checklist item and gives methodological background and published examples of transparent reporting. The STROBE checklist is best used in conjunction with this article (freely available on the Web sites of PLoS Medicine at <http://www.plosmedicine.org/>, Annals of Internal Medicine at <http://www.annals.org/>, and Epidemiology at <http://www.epidem.com/>). Information on the STROBE Initiative is available at <http://www.strobe-statement.org>.

30  
31  
32  
33  
34  
35  
36  
37  
38  
39  
40  
41  
42  
43  
44  
45  
46  
47  
48  
49  
50  
51  
52  
53  
54  
55  
56  
57  
58  
59  
60
