# Supplementary material for: Midlife socioeconomic position and old-age dementia mortality: a large prospective register-based study from Finland
Source: PubMed Central journal article supplement (PMC6955538; doi:10.1136/bmjopen-2019-033234), 2020-01-06
Supplement: bmjopen-2019-033234supp001.pdf [file bmjopen-2019-033234supp001.pdf]

**Supplementary Table 1.** Classification of chronic health conditions used as covariates in the study

| Condition                                                    | Hospital diagnoses (ICD-10)                                               | Prescription medication (ATC) | Special reimbursement category (Finnish disease code) |
|--------------------------------------------------------------|---------------------------------------------------------------------------|-------------------------------|-------------------------------------------------------|
| Alcohol-related diseases and accidental poisoning by alcohol | F10–19, G31.2, G40.51, G62.1, G72.1, I42.6, K29.2, K70, K86.0, O35.4, X45 |                               |                                                       |
| Asthma and other COPD                                        | J43–46                                                                    |                               | 203                                                   |
| Diabetes                                                     | E10–14                                                                    | A10                           | 103                                                   |
| Heart disease                                                | I00–09, I20–52                                                            |                               | 201, 206, 207                                         |

Abbreviations: ATC, Anatomical Therapeutic Chemical; COPD, chronic obstructive pulmonary diseases; ICD, International Classification of Diseases
