# Supplementary material for: Midlife socioeconomic position and old-age dementia mortality: a large prospective register-based study from Finland
Source: PubMed Central journal article supplement (PMC6955538; doi:10.1136/bmjopen-2019-033234), 2020-01-06
Supplement: bmjopen-2019-033234supp002.pdf [file bmjopen-2019-033234supp002.pdf]

**Supplementary Table 2.** Kaplan-Meier survival probabilities at specific ages by midlife a) education, b) occupational social class and c) household income quintile (Q1=highest, Q5=lowest), Finnish men and women in 2001–2016

|                                     | Age | Dementia          |           | Other causes      |           |
|-------------------------------------|-----|-------------------|-----------|-------------------|-----------|
|                                     |     | Survivor function | 95% CI    | Survivor function | 95% CI    |
| <b>a) Education</b>                 |     |                   |           |                   |           |
| Tertiary                            | 70  | 1.00              |           | 1.00              |           |
|                                     | 75  | 0.99              | 0.99–1.00 | 0.91              | 0.89–0.92 |
|                                     | 80  | 0.97              | 0.97–0.98 | 0.80              | 0.78–0.82 |
|                                     | 85  | 0.92              | 0.90–0.92 | 0.63              | 0.61–0.65 |
|                                     | 90  | 0.76              | 0.75–0.78 | 0.43              | 0.41–0.44 |
|                                     | 95  | 0.53              | 0.50–0.56 | 0.23              | 0.22–0.25 |
|                                     | 100 | 0.29              | 0.24–0.35 | 0.09              | 0.07–0.11 |
| Basic                               | 70  | 1.00              |           | 1.00              |           |
|                                     | 75  | 0.99              | 0.99–1.00 | 0.88              | 0.87–0.89 |
|                                     | 80  | 0.97              | 0.97–0.97 | 0.74              | 0.73–0.74 |
|                                     | 85  | 0.89              | 0.89–0.90 | 0.56              | 0.55–0.56 |
|                                     | 90  | 0.73              | 0.73–0.74 | 0.36              | 0.36–0.37 |
|                                     | 95  | 0.48              | 0.47–0.49 | 0.19              | 0.18–0.20 |
|                                     | 100 | 0.22              | 0.20–0.24 | 0.06              | 0.05–0.07 |
| <b>b) Occupational social class</b> |     |                   |           |                   |           |
| Non-manual                          | 70  | 1.00              |           | 1.00              |           |
|                                     | 75  | 1.00              | 0.99–1.00 | 0.92              | 0.90–0.93 |
|                                     | 80  | 0.97              | 0.97–0.98 | 0.80              | 0.79–0.81 |
|                                     | 85  | 0.91              | 0.90–0.92 | 0.64              | 0.63–0.65 |
|                                     | 90  | 0.76              | 0.75–0.77 | 0.44              | 0.43–0.45 |
|                                     | 95  | 0.51              | 0.49–0.52 | 0.25              | 0.24–0.26 |
|                                     | 100 | 0.24              | 0.21–0.27 | 0.10              | 0.09–0.11 |
| Manual                              | 70  | 1.00              |           | 1.00              |           |
|                                     | 75  | 0.99              | 0.99–0.99 | 0.87              | 0.85–0.88 |
|                                     | 80  | 0.97              | 0.96–0.97 | 0.71              | 0.70–0.72 |
|                                     | 85  | 0.89              | 0.89–0.90 | 0.53              | 0.52–0.54 |
|                                     | 90  | 0.73              | 0.72–0.73 | 0.34              | 0.34–0.35 |
|                                     | 95  | 0.46              | 0.45–0.47 | 0.17              | 0.17–0.18 |
|                                     | 100 | 0.21              | 0.18–0.24 | 0.06              | 0.05–0.07 |

|                     | Age | Dementia          |           | Other causes      |           |
|---------------------|-----|-------------------|-----------|-------------------|-----------|
|                     |     | Survivor function | 95% CI    | Survivor function | 95% CI    |
| c) Household income |     |                   |           |                   |           |
| Q1                  | 70  | 1.00              |           | 1.00              |           |
|                     | 75  | 0.99              | 0.99–1.00 | 0.91              | 0.90–0.92 |
|                     | 80  | 0.97              | 0.97–0.98 | 0.79              | 0.78–0.80 |
|                     | 85  | 0.92              | 0.91–0.92 | 0.62              | 0.61–0.63 |
|                     | 90  | 0.75              | 0.74–0.76 | 0.43              | 0.42–0.44 |
|                     | 95  | 0.51              | 0.49–0.53 | 0.24              | 0.22–0.25 |
|                     | 100 | 0.24              | 0.20–0.28 | 0.09              | 0.08–0.11 |
| Q5                  | 70  | 1.00              |           | 1.00              |           |
|                     | 75  | 0.99              | 0.99–1.00 | 0.85              | 0.83–0.87 |
|                     | 80  | 0.96              | 0.95–0.97 | 0.68              | 0.67–0.70 |
|                     | 85  | 0.88              | 0.87–0.89 | 0.50              | 0.48–0.51 |
|                     | 90  | 0.71              | 0.70–0.72 | 0.31              | 0.30–0.32 |
|                     | 95  | 0.45              | 0.43–0.47 | 0.15              | 0.14–0.16 |
|                     | 100 | 0.23              | 0.19–0.26 | 0.04              | 0.04–0.06 |
